1

2 **Nanometer-Scale Imaging of Compartment-Specific Localization and**

3 **Dynamics of Voltage-Gated Sodium Channels**

4

5

6

7

8

9 **Authors:** Hui Liu<sup>1</sup>, Hong-Gang Wang<sup>2</sup>, Geoffrey S. Pitt<sup>2</sup> and Zhe J. Liu<sup>1,\*</sup>

10 <sup>1</sup>Janelia Research Campus, Howard Hughes Medical Institute, Ashburn, VA 20147, USA.

11 <sup>2</sup>Cardiovascular Research Institute, Weill Cornell Medicine, New York, NY 10021, USA.

12 \*Correspondence: [liuz11@janelia.hhmi.org](mailto:liuz11@janelia.hhmi.org) (Z.J.L.);

## 13 **ABSTRACT**

14 Membrane excitability and cell-to-cell communication in the brain are tightly regulated by diverse  
15 ion channels and receptor proteins localized to distinct membrane compartments. Currently, a  
16 major technical barrier in cellular neuroscience is lack of reliable methods to label these membrane  
17 proteins and image their sub-cellular localization and dynamics. To overcome this challenge, we  
18 devised optical imaging strategies that enable systematic characterization of subcellular  
19 composition, relative abundances and trafficking dynamics of membrane proteins at nanometer  
20 scales in cultured neurons as well as in the brain. Using these methods, we revealed exquisite  
21 developmental regulation of subcellular distributions of voltage-gated sodium channel (VGSC)  
22  $Na_v1.2$  and  $Na_v1.6$ , settling a decade long debate regarding the molecular identity of sodium  
23 channels in dendrites. In addition, we discovered a previously uncharacterized trafficking pathway  
24 that targets  $Na_v1.2$  to unmyelinated fragments in the distal axon. Myelination counteracts this  
25 pathway, facilitating the installment of  $Na_v1.6$  as the dominant VGSC in the axon. Together, these  
26 imaging approaches unveiled compartment-specific trafficking mechanisms underpinning  
27 differential membrane distributions of VGSCs and open avenues to decipher how membrane  
28 protein localization and dynamics contribute to neural computation in the brain.

## 29 INTRODUCTION

30 Information processing in the brain is regulated at the molecular level by diverse membrane  
31 proteins such as ion channels and receptor proteins (Catterall, Goldin, & Waxman, 2005; Hodgkin  
32 & Huxley, 1952). Two broad types of ion channels are: voltage-gated ion channels and ligand-  
33 gated ion channels. In mammals, it was estimated that ~140 genes encode voltage-gated K<sup>+</sup>, Na<sup>+</sup>  
34 and Ca<sup>2+</sup> channels (Yu, Yarov-Yarovoy, Gutman, & Catterall, 2005). In addition to ion channels,  
35 a large number of metabotropic receptors convert extracellular stimuli to intracellular signaling  
36 responses via G protein or protein kinase mediated pathways (Niswender & Conn, 2010; Stevens  
37 et al., 2013). Single-cell RNA-seq data reveal that neuron and glial populations in the brain express  
38 distinct sets of membrane proteins (Cembrowski, Wang, Sugino, Shields, & Spruston, 2016; Zeisel  
39 et al., 2015), suggesting that membrane physiology is tightly regulated in a cell-type specific  
40 manner. Thus, one key challenge in cellular neuroscience is to decipher how the spatial distribution  
41 of ion channels and receptor proteins along the complex membrane topology controls signal  
42 integration, action potential initiation, backward propagation and synaptic plasticity in the context  
43 of a specific circuitry (Lai & Jan, 2006; Vacher, Mohapatra, & Trimmer, 2008).

44         Currently, one of the major challenges to probe membrane proteins in the brain is lack of  
45 reliable methods to label endogenous ion channel or receptor proteins. Specifically, traditional  
46 immuno-labeling is associated with several limitations: 1) nonspecific cross-reaction, especially  
47 for antibodies against closely related channels and receptors; 2) insufficient sensitivity when the  
48 copy number of the target protein is low; 3) subcellular localization information is obscured by  
49 high packing density of neurites in the brain (Mikuni, Nishiyama, Sun, Kamasawa, & Yasuda,  
50 2016). As a result, mapping sub-cellular localization of membrane proteins poses tremendous  
51 challenges for neuroscientists (Baker, 2020).

52 To address these limitations, here we combined CRISPR/Cas9 *in vivo* genome editing with  
53 high affinity peptide tags (V5 (GKPIPPLLGLDST) or HA (YPYDVPDYA)) and self-labeling  
54 tags (*e.g.* HaloTag) to label membrane proteins. Sparse cell labeling and high sensitivity of  
55 monoclonal antibodies enable us to reconstruct subcellular localizations of membrane proteins  
56 with high spatial resolution. Using brain-enriched voltage-gated sodium channel Na<sub>v</sub>1.2 and  
57 Na<sub>v</sub>1.6 as the model, we found that Na<sub>v</sub>1.2 is highly enriched in the AIS, dendrites and  
58 unmyelinated distal axon branches during early development. As animals develop into adults,  
59 Na<sub>v</sub>1.6 levels increase while Na<sub>v</sub>1.2 levels decrease in dendrites, accompanied by myelination  
60 dependent exclusion of Na<sub>v</sub>1.2 from the axon and an eventual installment of Na<sub>v</sub>1.6 as the  
61 dominant VGSC at the AIS and nodes of Ranvier. Super resolution and live-cell single molecule  
62 imaging in cultured neurons enables real time investigation of VGSC trafficking dynamics at  
63 nanometer scales. We found that while localization of Na<sub>v</sub>1.2 and Na<sub>v</sub>1.6 to the AIS is dependent  
64 on Ankyrin G binding domain (ABD) as previously described (Garrido *et al.*, 2003; Lemaillet,  
65 Walker, & Lambert, 2003), the targeting of Na<sub>v</sub>1.2 to unmyelinated fragments in the distal axon  
66 requires separated signals within the intracellular loop 1 (ICL1) between transmembrane domain  
67 I and II. Specifically, Na<sub>v</sub>1.2 ICL1 suppresses AIS retention and permits the membrane loading of  
68 Na<sub>v</sub>1.2 at the distal axon. Together, these results unveiled compartment-specific localization and  
69 trafficking mechanisms for Na<sub>v</sub>1.2 and Na<sub>v</sub>1.6, which could be modulated independently to fine  
70 tune membrane composition and physiological functions of VGSCs in the brain.



71 **RESULTS**

72 **Differential subcellular localizations of Nav1.2 and Nav1.6 in cultured hippocampal neurons**

73 Brain enriched VGSC Nav1.2 and Nav1.6 are critical for electrical signaling in the central nervous  
74 system and their mutations are associated with human genetic diseases such as infant epilepsy and  
75 autism spectrum disorder (Meisler, Hill, & Yu, 2021; Sanders et al., 2018). Previous studies  
76 indicated the prominent presence of Nav1.2 and Nav1.6 in the axon initial segment (AIS) of  
77 excitatory neurons. However, their composition in other neuronal compartments remains unclear  
78 (Johnson, Herold, Milner, Hemmings, & Platholi, 2017; Lorincz & Nusser, 2010; Spratt et al.,  
79 2019). Specifically, because of relative low copy number of VGSCs in dendrites and insufficient  
80 sensitivity of traditional methods, the dendritic composition of VGSCs is still under debate. For  
81 example, Nav1.6 was shown to localize in dendrites of hippocampal CA1 pyramidal neurons via a  
82 highly sensitive electron microscopic immune-gold technique, by which Nav1.2 was not detected  
83 (Lorincz & Nusser, 2010). However, another study showed the presence of Nav1.2 in dendrites  
84 and spines in the hippocampal CA1 region (Johnson et al., 2017). In addition, electrophysiology  
85 studies indicated that Nav1.2 plays a key role in Nav currents at the somatodendritic region of  
86 cortical neurons (Hu et al., 2009; Spratt et al., 2019).

87 To resolve this debate, we took advantage of previously established homology-independent  
88 targeted integration (HITI) genome editing method (Suzuki et al., 2016) (**Figure 1-figure**  
89 **supplement 1A**) and tagged *Scn2a* (Nav1.2) and *Scn8a* (Nav1.6) with small peptide tags (V5 or  
90 HA). We reason that the small size of these tags would minimize the risk of perturbing their  
91 physiological functions. Indeed, V5 tag insertion at two independent locations (C-terminus versus  
92 the extracellular loop between segment 5 and 6 in domain I) gave rise to comparable subcellular  
93 localization patterns (**Figure 1-figure supplement 2 and 3**). Single cell recording confirmed that

94 the tag insertion did not affect electrophysiological properties of Nav1.2 and Nav1.6 (**Figure 1-**  
95 **figure supplement 5**). Consistent with previous immune-staining results (Xu, Zhong, & Zhuang,  
96 2013), super-resolution STED imaging revealed that tagged Nav1.2 and Nav1.6 form ~200 nm  
97 periodic striations that showed anti-phased exclusion from actin rings at the AIS, further validating  
98 the labeling strategy (**Figure 1B, C**).

99 To quantify relative abundance of Nav1.2 and Nav1.6 in distinct neuronal compartments,  
100 we tagged both channels with the V5 tag, followed by labeling and imaging under the same  
101 condition. By cross referencing with AIS (Ankyrin G) and dendrite (MAP2) markers, we found  
102 that both channels showed highest enrichment in the AIS (**Figure 1-figure supplement 3**),  
103 consistent with previous reports (Hu et al., 2009; Lorincz & Nusser, 2010). Interestingly however,  
104 we found that the relative abundance of Nav1.2 are much higher than Nav1.6 in the distal axon and  
105 dendrites (**Figure 1D, Figure 1-figure supplement 4**). To confirm that what observed are not  
106 influenced by cell-type specific expression, we employed sequential HITI editing and achieved  
107 dual labeling of Nav1.2 (V5) and Nav1.6 (HA) in the same cell population (**Figure 1-figure**  
108 **supplement 1B**). Nav1.2 and Nav1.6 staining patterns in the dual labeling condition were  
109 consistent with what were observed in separate populations with highest levels of Nav1.2 and  
110 Nav1.6 in the AIS and Nav1.2 as the dominant VGSC in the distal axon and dendrites (**Figure 1A,**  
111 **Figure 1-figure supplement 1B, C, Video 1**). Live-cell non-permeable staining confirmed that  
112 Nav1.2 is indeed inserted into cell membrane in the distal axon and dendrites (**Figure 1-figure**  
113 **supplement 2**). Thus, here we were able to unambiguously confirm the localization of Nav1.2 in  
114 dendrites of cultured hippocampal pyramidal neurons.

115 The differential localization patterns of Nav1.2 and Nav1.6 prompted us to probe underlying  
116 trafficking mechanisms. Super-resolution Airyscan imaging and computer-aid segmentation

117 revealed no co-labelled fraction between Nav1.2 and Nav1.6 positive trafficking vesicles (**Figure**  
118 **1E, Video 2**), suggesting that once synthesized, Nav1.2 and Nav1.6 are sorted into distinct vesicle  
119 populations potentially coupled with separated trafficking and membrane loading pathways.

120

### 121 **Developmental regulation of Nav1.2 and Nav1.6 subcellular localizations in vivo**

122 To map Nav1.2 and Nav1.6 localizations *in vivo*, we used *in utero* electroporation to deliver the  
123 HITI construct into heterozygous H11-SpCas9 mouse embryos expressing Cas9 in all cell types  
124 (Chiou et al., 2015). The resulting sparse neuron labeling in the mouse cortex and hippocampus  
125 enabled us to quantify their levels in individual neurites across large distances at different  
126 developmental stages (Postnatal (P) 15, P30 (~one month) and P90 (~three months)) (**Figure 2A,**  
127 **Video 3-5**). In agreement with previous reports (Hu et al., 2009; Tian, Wang, Ke, Guo, & Shu,  
128 2014; Yamagata, Ogiwara, Mazaki, Yanagawa, & Yamakawa, 2017), we found that Nav1.2 and  
129 Nav1.6 are mainly expressed in CaMKII $\alpha$ -positive excitatory neurons, with no detectable  
130 expression in GAD67-positive inhibitory neurons (**Figure 2-figure supplement 2C-E**).

131 Because both Nav1.2 and Nav1.6 were tagged with the V5 peptide, we were able to estimate  
132 their relative abundances with high spatial resolution. At P15, both Nav1.2 and Nav1.6 were  
133 enriched at the AIS (**Figure 2A, Figure 2-figure supplement 2A, B**) with higher levels of Nav1.2  
134 in the distal axon and dendrites (**Figure 2A, G**), similar to our observations in cultured  
135 hippocampal neurons. Interestingly, Nav1.2 is enriched at the proximal part of the AIS while  
136 Nav1.6 is concentrated at the distal part of the AIS with a ~15  $\mu\text{m}$  gap between their concentration  
137 peaks (**Figure 2F**), consistent with a previous report (Hu et al., 2009). Interestingly however,  
138 Nav1.2 levels decreased significantly at the proximal AIS with the Nav1.6 concentration peak  
139 shifting inwards at P30 and P90 (**Figure 2-figure supplement 1**).

140 We were also able to confirm the localization of  $\text{Na}_v1.2$  in dendrites of cortical and  
141 hippocampal pyramidal neurons *in vivo* (**Figure 2A, Figure 2-figure supplement 2A**). In addition,  
142 we found that  $\text{Na}_v1.2$  is the dominant VGSC in dendrites during early development and its  
143 concentration gradually decreases, accompanied by an increase of  $\text{Na}_v1.6$  levels at this region as  
144 mice mature (**Figure 2G**).

145 Previous electrophysiology experiments revealed that  $\text{Na}_v1.6$  has much lower activation  
146 threshold and larger persistent currents than  $\text{Na}_v1.2$  (Rush, Dib-Hajj, & Waxman, 2005). These  
147 results suggested that neurons actively adjust their excitability by fine tuning the membrane  
148 composition and localization of  $\text{Na}_v1.2$  and  $\text{Na}_v1.6$  at different developmental stages. Specifically,  
149 during early development, the information processing at the somatodendritic region and the  
150 proximal AIS is mainly mediated by  $\text{Na}_v1.2$ , while  $\text{Na}_v1.6$  plays increasing important roles at these  
151 regions as the animal matures. Consistent with these results, human genetic studies found that  
152 mutations in  $\text{Na}_v1.2$  are primarily associated with early developmental diseases such as infant  
153 epilepsy and autism spectrum disorder (Meisler et al., 2021; Sanders et al., 2018).

154

### 155 **Myelination status as a key indicator of $\text{Na}_v1.2$ and $\text{Na}_v1.6$ localization patterns**

156 One consistent observation across all developmental stages is that the axonal coverage by  $\text{Na}_v1.2$   
157 is largely uninterrupted in neurons with high  $\text{Na}_v1.2$  expression levels, suggesting that these cells  
158 are unmyelinated (**Figure 2A, B, Video 3**). Indeed, when using myelin basic protein (MBP) to co-  
159 stain samples, we found that  $\text{Na}_v1.2$  was preferentially expressed (~60%) in unmyelinated neurons  
160 with a smaller fraction (~35%) of detectable expression in partially myelinated neurons and the  
161 lowest fraction (~5%) in fully myelinated neurons (**Figure 2B, C, E**). By contrast,  $\text{Na}_v1.6$  has  
162 similar fractions of detectable expression across all 3 populations (**Figure 2E**). In addition, we

163 found that the axonal coverage by Nav1.6 is restricted to Ankyrin G positive regions such as the  
164 AIS and nodes of Ranvier (**Figure 2D, Video 4 and Video 5**), whereas Nav1.2 broadly covers  
165 unmyelinated axonal fragments (**Figure 2B, Video 3**). Our results support that localizations and  
166 expression levels of these two channels alter with the myelination status of a neuron. Specifically,  
167 myelination excludes Nav1.2 and decreases its expression levels in the axon, with an eventual  
168 installment of Nav1.6 as the dominant VGSC at the AIS and nodes of Ranvier in fully myelinated  
169 neurons. Previous reports showed that, upon neuronal injury, the large persistent currents of Nav1.6  
170 at demyelinated sites trigger reverse action of Na<sup>+</sup>-Ca<sup>2+</sup> exchanger, leading to Ca<sup>2+</sup> influx that  
171 further damages the axon (Craner et al., 2004; Rush et al., 2005). This result explains the  
172 physiological need of coating unmyelinated axonal fragments with a VGSC that conducts smaller  
173 persistent currents such as Nav1.2.

174

### 175 **Compartment-specific Targeting Mechanisms for Nav1.2 and Nav1.6**

176 The differential localization patterns and separated vesicle populations associated with Nav1.2 and  
177 Nav1.6 suggest that they are trafficked by different pathways (**Figure 1E and 2A**). To study the  
178 underlying mechanism, we established a 2-color imaging assay in which Nav1.2 and Nav1.6  
179 (tagged with V5 and HA respectively) were co-expressed in cultured hippocampal neurons where  
180 their localization patterns can be directly compared in distinct subcellular compartments. We found  
181 that exogenously expressed Nav1.2(V5) and Nav1.6(HA) displayed similar localization patterns as  
182 endogenous knock in proteins, with both VGSCs enriched in AIS and Nav1.2 as the dominant  
183 VGSC in distal axon and dendrites (**Figure 3-figure supplement 1A**). Because of conserved  
184 sequence homology in membrane embedded domains, we focused on intracellular loops which  
185 have larger sequence divergences. Consistent with previous reports (Garrido et al., 2003; Gasser

186 et al., 2012; Lemaillet et al., 2003), we found that ABD deletion led to the loss of Nav1.2 and  
187 Nav1.6's enrichment at the AIS, interestingly with no significant effects on their distal axon and  
188 dendrite localization patterns (**Figure 3A, B, Figure 3-figure supplement 1B**). This result  
189 suggests that localization of Nav1.2 to the distal axon and dendrites is independent of its AIS  
190 anchoring signal (ABD). By extensive domain swapping between Nav1.2 and Nav1.6 (**Figure 3-**  
191 **figure supplement 2**), we identified the intracellular loop 1 (ICL1) between transmembrane  
192 domain I and II (**Figure 3A, Figure 3-figure supplement 4A**) as a key determinant for selective  
193 enrichment of Nav1.2 in the distal axon. Specifically, Nav1.2 with Nav1.6 ICL1 displayed the same  
194 localization pattern as Nav1.6, with very low enrichment in the distal axon. Conversely, Nav1.6  
195 harboring ICL1 from Nav1.2 showed comparable enrichment in the distal axon as Nav1.2 (**Figure**  
196 **3C, Figure 3-figure supplement 1A and 2C**). These results suggest that Nav1.2 ICL1 contains  
197 previously uncharacterized distal axon targeting and membrane loading signals.

198 To further dissect the function of ICL1, we fused it to GFP-P2A-mCherry. Strikingly, we  
199 found that Nav1.2 ICL1 itself was able to broadly target GFP to cell membrane across different  
200 compartments (soma, axon and dendrites) (**Figure 3D, E, Figure 3-figure supplement 3A**),  
201 whereas Nav1.6 ICL1-GFP signals were largely in the nucleus (**Figure 3-figure supplement 3B-**  
202 **D**), consistent with previous reporting of a nucleus localization signal within this region (Onwuli  
203 et al., 2017). Using this assay, we further determined that a 36 amino acid region (AA725-760)  
204 within Nav1.2 ICL1 was sufficient for anchoring GFP to membrane (**Figure 3-figure supplement**  
205 **4B**). Together, these results suggest that Nav1.2 is targeted to AIS and the distal axon via a  
206 separated, previously characterized trafficking pathway.

207

208 **A model for targeting Nav1.2 to unmyelinated fragments in the distal axon**

209 To build a physical model to explain how differential subcellular localizations of Nav1.2 and  
210 Nav1.6 are dynamically established at the molecular level, we sought to utilize live-cell single-  
211 molecule imaging approaches that we established previously (Chen et al., 2014; Liu et al., 2018).  
212 These methods with nanometer scale detection sensitivity have been widely adopted to study  
213 transcription factor and vesicle dynamics (Chen et al., 2014; Chong et al., 2018; Knight et al., 2015;  
214 Liu et al., 2018) in live cells. To achieve live-cell labeling, we knocked in HaloTag at the C-  
215 terminus of these two VGSCs, followed by staining with bright, membrane permeable Janelia  
216 Fluor dyes (Grimm et al., 2015). We found that localization patterns of HaloTag-labeled Nav1.2  
217 and Nav1.6 in the AIS were similar to these tagged with V5 and HA tag (**Figure 4-figure**  
218 **supplement 1**), suggesting that HaloTag labeling did not significantly perturb Nav1.2 and Nav1.6  
219 trafficking. Then, we devised a pulse-chase assay in which we first used high concentrations of  
220 JF646-HaloTag ligand (HTL) to block pre-existing VGSC-HaloTag molecules and then we pulsed  
221 cells with JF549-HTL for short durations to label newly synthesized VGSCs. This technique  
222 allowed us to control labeling density by tuning pulse durations and thus obtain long trajectories  
223 of trafficking VGSCs under sparse labeling conditions (**Figure 4A**).

224 To establish a simple and effective method to quantify dynamic states (stable binding, local  
225 exploration, diffusion and active transport) associated with trafficking and membrane loading, we  
226 took advantage of the “Radius of Confinement (RC)” parameter which we used successfully to  
227 study binding and diffusion states of diverse transcription factors (Lerner et al., 2020). Specifically,  
228 the RC is defined as the distance from the center of mass to the furthest point of the trajectory  
229 (**Figure 4B**). Intuitively, fast diffusion and active transport events along the neurites should  
230 correlate with larger RCs compared with bound and local exploration states (**Figure 4B, C**). Indeed,  
231 we found that ABD deletion in Nav1.2 or Nav1.6 led to a dramatic reduction of shorter RC fractions



232 and an increase in longer RC fractions, reflecting less binding but more active transport events in  
233 the AIS, consistent with known functions of ABD (**Figure 4C**). Conversely, inhibiting active  
234 transport by ATP analog (AMPPNP) significantly reduced active transport (longer RC) fractions  
235 but increased short RC fractions in distal axon (**Figure 4C**), confirming the ability of the RC  
236 analysis to separate distinct dynamic states.

237 To dissect the molecular basis underlying each dynamic state, we next coupled the RC  
238 analysis with genetic perturbations. We found that Nav1.2 displayed significantly less binding and  
239 more active transport events in AIS than Nav1.6 (**Figure 4C**). Similarly, replacing ICL1 in Nav1.6  
240 with Nav1.2 ICL1 decreased binding and induced more active transport in the AIS and soma. The  
241 opposite is true as Nav1.2 with Nav1.6 ICL1 has more binding but less active transport events than  
242 Nav1.2 (**Figure 4D**). The remarkable consistency in these results support that Nav1.2 ICL1  
243 promotes active transport and suppresses retention in the AIS, counterbalancing the anchoring  
244 effect of ABD. Complementary with these results, we found that Nav1.2 with the membrane  
245 anchoring domain ICL-36aa (AA725-760) replaced with the same region from Nav1.6 showed  
246 much less binding at the distal axon, suggesting that this domain is critical for membrane insertion  
247 of Nav1.2 (**Figure 4E**), consistent with its ability to anchor GFP to cell membrane. Taken together,  
248 these results suggest that localization of Nav1.2 to the distal axon requires two distinct functions  
249 of ICL1: one for reducing anchoring at the AIS; the other for promoting membrane insertion at the  
250 distal axon (**Figure 4G**).

251 Next, we used fluorescence recovery after photobleaching (FRAP) to examine lateral  
252 diffusion of membrane bound Nav1.2 and Nav1.6 across different compartments. For this assay,  
253 we utilized Pitstop 2 to block endocytosis mediated exchanges on the membrane so that fluorescent  
254 recovery is largely dependent on lateral diffusion. We found that both Nav1.2 and Nav1.6 showed



255 slow exchanging rates at the AIS with only ~15% recovery 1 hour after photobleaching, whereas,  
256 in the distal axon and dendrites, VGSC is more dynamic, with ~60 percent recovery in the distal  
257 axon and ~50 percent recovery in the dendrites ~0.5 hour after photobleaching (**Figure 4F, Video**  
258 **6**). These results are consistent with that lateral diffusion of VGSCs is also regulated in a  
259 compartment-specific fashion ranging from minimal mobility in the AIS to faster diffusion in  
260 dendrites and the distal axon (**Figure 4G**). It is likely that the reduced VGSC lateral diffusion in  
261 the AIS could be related to the unique, ring-like cytoskeleton structures at this region showing  
262 anti-phase, exclusive distributions to VGSC striations (**Figure 1B, C**).

## 263 DISCUSSION

264 Here, we demonstrated nanometer-scale imaging strategies to characterize sub-cellular  
265 localization, relative abundances and tracking dynamics of membrane proteins in the brain. We  
266 overcame the limitations of traditional immune-labeling methods and provided an unprecedentedly  
267 clear view of Na<sub>v</sub>1.2 and Na<sub>v</sub>1.6 subcellular localizations both *in vitro* and *in vivo*. Our results  
268 confirmed key results from previous studies and provided new insights into compartment-specific  
269 VGSC localization patterns at different developmental stages, providing direct imaging evidence  
270 to clarify decade long debates in the field.

271         The most pronounced difference between Na<sub>v</sub>1.2 and Na<sub>v</sub>1.6 localizations that we observed  
272 is in the distal axon, where their expression and localization patterns showed intricate relationships  
273 with the myelination status of a neuron. Specifically, Na<sub>v</sub>1.2 covers unmyelinated fragments in the  
274 distal axon. The myelination process itself excludes Na<sub>v</sub>1.2 and decreases Na<sub>v</sub>1.2 levels in the axon.  
275 By contrast, Na<sub>v</sub>1.6 only localizes to ankyrin G positive regions such as the AIS and nodes of  
276 Ranvier. In myelinated neurons, Na<sub>v</sub>1.6 becomes the dominant VGSC in the distal axon, as we did  
277 not detect substantial enrichment of Na<sub>v</sub>1.2 at nodes of Ranvier, consistent with previous results  
278 (Boiko et al., 2001; Caldwell, Schaller, Lasher, Peles, & Levinson, 2000). Na<sub>v</sub>1.2 and Na<sub>v</sub>1.6 share  
279 conserved sequence and structure homology. Thus, their abilities to establish such complex  
280 differential localization patterns are particularly intriguing.

281         Here, by dual labeling and 2-color super resolution imaging, we first established that, once  
282 synthesized, Na<sub>v</sub>1.2 and Na<sub>v</sub>1.6 are sorted into distinct trafficking vesicles. By coupling pulse-  
283 chase labeling with single-molecule imaging, we confirmed that the localization of Na<sub>v</sub>1.2 and  
284 Na<sub>v</sub>1.6 to AIS requires previously identified Ankyrin G-binding domain (ABD) (Garrido et al.,  
285 2003; Gasser et al., 2012; Lemaillet et al., 2003). Interestingly, we found that separated signals

286 located in ICL1 are responsible for targeting and membrane loading of Na<sub>v</sub>1.2 to/at the distal axon.  
287 Strikingly, Na<sub>v</sub>1.6 with Na<sub>v</sub>1.2 ICL1 gained access to the distal axon. Na<sub>v</sub>1.2 ICL1 alone targets  
288 GFP molecules to cell membrane. Single molecule imaging revealed that Na<sub>v</sub>1.2 ICL1 promotes  
289 active transport, suppresses retention at the AIS and promotes membrane loading at the distal axon.

290 Our results demonstrated that the complex localization patterns of VGSCs are established  
291 by compartment-specific trafficking and loading mechanisms. For deeper understanding of  
292 molecular mechanisms, it would be critical to identify ICL1 interaction partners and their  
293 associated pathways in the future. Nonetheless, the developmental regulation and the differential  
294 localization patterns revealed in our study clarified current debates on membrane composition of  
295 VGSCs, which would help us better understand their physiological and pathological functions in  
296 the brain.

## 297 MATERIALS AND METHODS

### 298 Animals

299 Homozygous H11<sup>LSL-Cas9</sup> CRISPR/Cas9 knock-in male mice (Jackson laboratory, JAX Stock  
300 #027632) (Chiou et al., 2015) were crossed with wild type C57Bl/6 females to get time pregnant  
301 heterozygous litters for *in utero* electroporation. All procedures were in accordance with protocols  
302 approved by the Janelia Research Campus Institutional Animal Care and Use Committee. Mice  
303 were housed in a 12:12 light:dark cycle.

304

### 305 DNA constructs

306 Knockin constructs containing SpCas9, gRNA and donor DNA were modified from PX551 and  
307 PX552 backbones, which were gifts from Feng Zhang (Addgene plasmid #60957 and #60958).  
308 An EF1 promoter-driven ‘spaghetti monster’ fluorescent protein with Flag tag (smFP\_Flag)  
309 (Viswanathan et al., 2015) cassette was inserted into PX552 construct to indicate successful  
310 plasmid transfection. All gRNAs were designed by CHOPCHOP (Labun et al., 2019). The gRNA  
311 targeting sequence of mouse *Scn2a* (site 1, C-terminus) is: 5’-GGACAAGGGGAAAGATATCA-  
312 3’; The gRNA targeting sequence of rat *Scn2a* (site 2, extracellular loop between segment 5 and 6  
313 in domain I) is: 5’-TGGTACTGCCTTCAATAGGA-3’; The gRNA targeting sequence of mouse  
314 *Scn8a* (C-terminus) is: 5’-CCGACAAGGAGAAGCAGCAG-3’. Plasmids encoding mouse  
315 Nav1.2 (NP\_001092768.1) and Nav1.6 (NP\_001070967.1) were cloned by Gibson Assembly  
316 (NEB) with synthetic gBlocks gene fragments (Integrated DNA Technologies). Plasmids used for  
317 electrophysiological recording tests were designed based on the final sequences after SpCas9-  
318 mediated HITI.

319

## 320 **Primary Culture of Hippocampal Neurons**

321 We prepared dissociated hippocampal neurons from P0 to 1 Sprague-Dawley rat or C57Bl/6 mouse  
322 pups. Briefly, the hippocampi were dissected out and digested with papain (Worthington  
323 Biochemical). After digestion, the tissues were gently triturated and filtered with the cell strainer.  
324 The cell density was counted and  $\sim 2.5 \times 10^5$  cells were transfected with indicated constructs by  
325 using P3 Primary Cell 4D-Nucleofector X kit (Lonza). After transfection, neurons were plated  
326 onto poly-D-lysine (PDL, Sigma)-coated coverslips and maintained in NbActiv4 medium  
327 (BrainBits) at 37 °C for indicated days.

328

## 329 **Immunofluorescence Staining of cultured hippocampal neurons**

330 Cultured neurons were fixed with 4% paraformaldehyde, permeabilized and blocked with 10%  
331 fetal bovine serum, 1% Triton in PBS, incubated with primary antibodies against V5 tag (R960-  
332 25, ThermoFisher Scientific, 1:1000; 13202, Cell Signaling Technology, 1:1000), HA tag (3724,  
333 Cell Signaling Technology, 1:1000), AnkG (75-146, Antibodies Incorporated, 1:1000), MAP2  
334 (AB5622, Millipore, 1:5000), GFP (A-11122, ThermoFisher Scientific, 1:1000), or Flag tag  
335 (ab1257, Abcam, 1:1000) overnight at 4°C. After washing with 10% fetal bovine serum in PBS,  
336 neuron samples were stained with Alexa Fluor-conjugated secondary antibodies (1:1000,  
337 ThermoFisher Scientific) and imaged with Nikon A1R confocal microscope or Zeiss LSM 880  
338 Airyscan microscope. For actin staining, samples were stained with Alexa Fluor 594 phalloidin  
339 (A12381, 1:1000, ThermoFisher Scientific) and imaged with Leica SP8 STED microscope.

340

## 341 ***In Utero* Electroporation and Histology**

342 *In utero* electroporation was performed as previously described (Mikuni et al., 2016; Petreanu,  
343 Mao, Sternson, & Svoboda, 2009). In brief, time- pregnant mouse (E13 for hippocampus and E15  
344 for cerebral cortex) was anesthetized with 2 ~ 2.5% isoflurane with an O<sub>2</sub> flow rate of 0.5 ~ 0.8  
345 L/min. Before the surgery, use a cotton-tip applicator to coat both eyes with puralube and  
346 administer buprenorphine (0.1 mg/kg, intraperitoneal injection; Bedford Laboratories) for  
347 analgesia. DNA solution (1 ~ 2  $\mu$ l @ 1  $\mu$ g/ $\mu$ l) was injected into the lateral ventricle via picospritzer.  
348 Electrical pulses (E13: 40 V for 50 ms, 8 times with 1 s intervals; E15: 45 V for 50 ms, 8 times  
349 with 1 s intervals) were delivered through ECM 830 electroporator. Administer Ketapofen (5  
350 mg/kg, intraperitoneal injection; Bedford Laboratories) to reduce inflammation when the surgery  
351 was done and once a day for two days after the surgery.

352 After mouse pups were born and reached indicated ages, they were deeply anesthetized  
353 and perfused with 4% paraformaldehyde in 0.1 M phosphate buffer, pH 7.4. The brain was  
354 dissected out and post-fixed overnight. After rinsed with PBS, coronal vibratome sections (70  $\mu$ m  
355 in thickness) were made (VT1200S, Leica). The sections were permeabilized and blocked with 10%  
356 fetal bovine serum, 1% Triton in PBS, incubated with primary antibodies against V5 tag (13202,  
357 Cell Signaling Technology, 1:1000) and AnkG (75-146, Antibodies Incorporated, 1:1000), MBP  
358 (SMI-99, Millipore Sigma, 1:1000), Caspr (75-001, Antibodies Incorporated, 1:1000), CaMKII $\alpha$   
359 (MA1-048, ThermoFisher Scientific, 1:400) or GAD67 (MAB5406, Millipore Sigma, 1:1000)  
360 overnight at 4°C. After washing with 10% fetal bovine serum in PBS, neuron samples were stained  
361 with Alexa Fluor-conjugated secondary antibodies (ThermoFisher Scientific) and imaged with  
362 Zeiss 880 Airyscan microscope.

363 MBP staining images were used to quantify the percentage of labeled Na<sub>v</sub>1.2 or Na<sub>v</sub>1.6 in  
364 unmyelinated, myelinating and myelinated neurons. Unmyelinated neurons are the ones with

365  $Na_v1.2$  or  $Na_v1.6$  signals and without MBP signals along the whole axon. Partially myelinated  
366 neurons are the ones with fragmented  $Na_v1.2$  or  $Na_v1.6$  signals ( $> 10 \mu\text{m}$ ) interspaced with MBP  
367 signals along the axon. Myelinated neurons are the ones with  $Na_v1.2$  or  $Na_v1.6$  signals in mature  
368 nodes of Ranvier ( $< 10 \mu\text{m}$ ) interspaced with MBP signals along the axon. The intensity  
369 distribution profiles along the AIS region and the intensity levels in dendrite of  $Na_v1.2$  and  $Na_v1.6$   
370 in mouse cortical neurons at different ages were analyzed with Fiji. The mean background intensity  
371 was subtracted before all further analysis.

372

### 373 **Whole-Cell Recording**

374 HEK293 cells were cultured in Dulbecco's modified Eagle's culture media with 10% fetal bovine  
375 serum in a  $37^\circ\text{C}$  incubator with 5%  $\text{CO}_2$  and were grown in 60-mm culture dishes. Plasmids  
376 encoding wild type (*WT*) or V5-labeled  $Na_v1.2$ , or wild type  $Na_v1.6$  or V5-labeled  $Na_v1.6$  ( $4 \mu\text{g}$ )  
377 were co-transfected with *Scn1b* ( $2 \mu\text{g}$ ), *Scn2b* ( $2 \mu\text{g}$ ) and eGFP ( $0.3 \mu\text{g}$ ) using Lipofectamine 2000  
378 (ThermoFisher Scientific). Whole-cell voltage-gated sodium ( $\text{Na}^+$ ) currents were measured 48  
379 hours after transfection at room temperature under voltage patch-clamp configuration with an  
380 Axopatch 200B amplifier (Molecular Devices) and sampled at 10 kHz and filtered at 2 kHz.  $\text{Na}^+$   
381 currents were elicited with a 50 ms depolarization step from  $-100 \text{ mV}$  with 5 mV increment at a  
382 holding potential of  $-100 \text{ mV}$ . Steady-state inactivation were tested by a two-pulse protocol with  
383 the first pulse of 500 ms from  $-100 \text{ mV}$  to  $-10 \text{ mV}$  at 5 mV increment followed by a second pulse  
384 fixed at  $-10 \text{ mV}$ . Gating activation and steady-state inactivation curves were obtained using a  
385 Boltzmann function as reported previously (Wang et al., 2021). The pipette solution contained (in  
386 mM): CsF 35, CsCl 50, L-aspartic acid 55, NaCl 10, EGTA 5,  $\text{MgCl}_2$  1, Mg-ATP 4, Na-GTP 0.4  
387 and HEPES 10, pH 7.3 with CsOH; the external solution contained (in mM): NaCl 120, KCl 5.4,

388 CaCl<sub>2</sub> 1.8, MgCl<sub>2</sub> 1, HEPES 10, glucose 10, tetraethylammonium chloride 20, pH 7.4 with NaOH.  
389 The access resistance was 7.9±0.9 MΩ (*WT*) versus 6.9±0.4 MΩ (V5-labeled) (*t* test, *p* = 0.34)  
390 with 60-80% compensation, and 6.7±0.6 MΩ (*WT*) versus 6.0±0.5 MΩ (V5-labeled) (*t* test, *p* =  
391 0.43) with 80-90 % compensation for Na<sub>v</sub>1.2 and Na<sub>v</sub>1.6, respectively.

392

### 393 **Pulse-Chase Single Molecule Imaging**

394 Transfected hippocampal neurons were plated onto an ultra-clean cover glass pre-coated with PDL  
395 and cultured for indicated days (days *in vitro*, DIV 9 ~ 10). The cells were first incubated with 100  
396 mM JF646-HTL for 1.5~2 hrs. After washout, the labeling medium was replaced with 10 mM  
397 JF549-HTL for chase labeling (20 minutes for overexpression experiments, 40 minutes for knockin  
398 experiments). After final washout, the cover glass was transferred to live-cell culturing metal  
399 holder with phenol red free NbActiv4 medium and mounted onto Nikon Eclipse TiE Motorized  
400 Inverted microscope equipped with a 100X oil-immersion objective (Nikon, N.A. = 1.49), an  
401 automatic TIRF/HILO illuminator, a perfect focusing system, a tri-cam splitter, three EMCCDs  
402 (iXon Ultra 897, Andor) and Tokai Hit environmental control (humidity, 37 °C, 5% CO<sub>2</sub>).  
403 AMPPNP (1 mM, Sigma, A2647) was added during whole imaging period for indicated  
404 experiment. Before single molecule imaging, one snapshot JF646 image was captured to indicate  
405 the general labeling profile. For tracking JF549-labeled single molecules, we used 561 nm laser  
406 with the excitation power of ~150 W/cm<sup>2</sup> at an acquisition time of 100 ms.

407

### 408 **Fluorescent Recovery After Photobleaching**

409 Cultured mouse hippocampal neurons harboring Na<sub>v</sub>1.2 or Na<sub>v</sub>1.6 knockin with HaloTag (DIV 9  
410 ~ 10) were labeled with 20 mM JF549-HTL for 0.5 hr. After washout, the cover glass was



411 transferred to live-cell culturing metal holder with phenol red free NbActiv4 medium and mounted  
412 onto Zeiss LSM 880 confocal microscope equipped with a 40X oil-immersion objective (N.A. =  
413 1.40), a definite focus module, and a large incubation unit for global CO<sub>2</sub> and temperature control  
414 (37 °C) along with heated stage insert. 3 frames were acquired before photobleaching and 297  
415 frames were acquired to observe fluorescent recovery after photobleaching with a time interval of  
416 15 seconds. Pitstop 2 (30 μM, Sigma, SML1169) was added to inhibit endocytosis during the  
417 labeling and imaging period for indicated conditions. Fiji was used to analyze fluorescent recovery.  
418 Relative intensity of the photobleached region of interest (ROI) were calculated by subtracting  
419 mean intensity of the background from the photobleached ROI region, followed by normalized to  
420 the mean intensity of the pre-bleach ROI.

421

#### 422 **Single-Molecule Localization, Tracking and Diffusion Analysis**

423 For single-molecule localization and tracking, the spot localization (x,y) was obtained through 2D  
424 Gaussian fitting based on MTT algorithms (Serge, Bertaux, Rigneault, & Marguet, 2008). The  
425 localization and tracking parameters in SPT experiments are listed in the **Table 1**. The Radius of  
426 Confinement (RC) for each trajectory is calculated as the distance between the center of mass (the  
427 average position of all localizations in the trajectory) to the furthest localization from the center of  
428 mass. The differential probability density function (PDF) curve is obtained by subtraction of RC  
429 PDF distributions between conditions as indicated in each figure panel.

430

#### 431 **Statistics**

432 Comparisons between two groups were performed with Student's *t* test. Comparisons among  
433 multiple groups were performed with one-way ANOVA and *post hoc* Bonferroni test. Differences  
434 were considered to reach statistical significance when  $p < 0.05$ .

435

#### 436 **Data Availability Statement**

437 The data that support the findings of this study are available from the corresponding author upon  
438 request.

439 **ACKNOWLEDGEMENTS**

440 We thank M. Radcliff for assistance and Liu Lab members for providing help and suggestions. We  
441 thank L. Sarah, the breeding and surgery team at Janelia Research Campus for helping us with *in*  
442 *utero* electroporation experiment. We thank W. Deepika for helping us with primary culture of  
443 hippocampal neurons. We thank the histology facility and advanced imaging center at Janelia  
444 Research Campus for helping us with histology and imaging experiments. We thank Lavis Lab at  
445 Janelia Research Campus for kindly providing JF549-HTL and JF646-HTL. Z.J.L. and H.L. is  
446 funded by Howard Hughes Medical Institute (HHMI). G.S.P. and H.G.W. is funded by NIH R01  
447 MH118934.

448

449 **AUTHOR CONTRIBUTIONS**

450 Z.J.L. and H.L. conceived and designed the experiments. H.L. performed and participated in all  
451 experiments. G.S.P. and H.G.W. designed and performed the electrophysiology experiment. Z.J.L.  
452 and H.L. analyzed the data and wrote the manuscript. G.S.P. and H.G.W. helped write the  
453 manuscript. Z.J.L. supervised the research.

454

455 **DECLARATION OF INTERESTS**

456 The authors declare no competing financial interests.

457 FIGURES

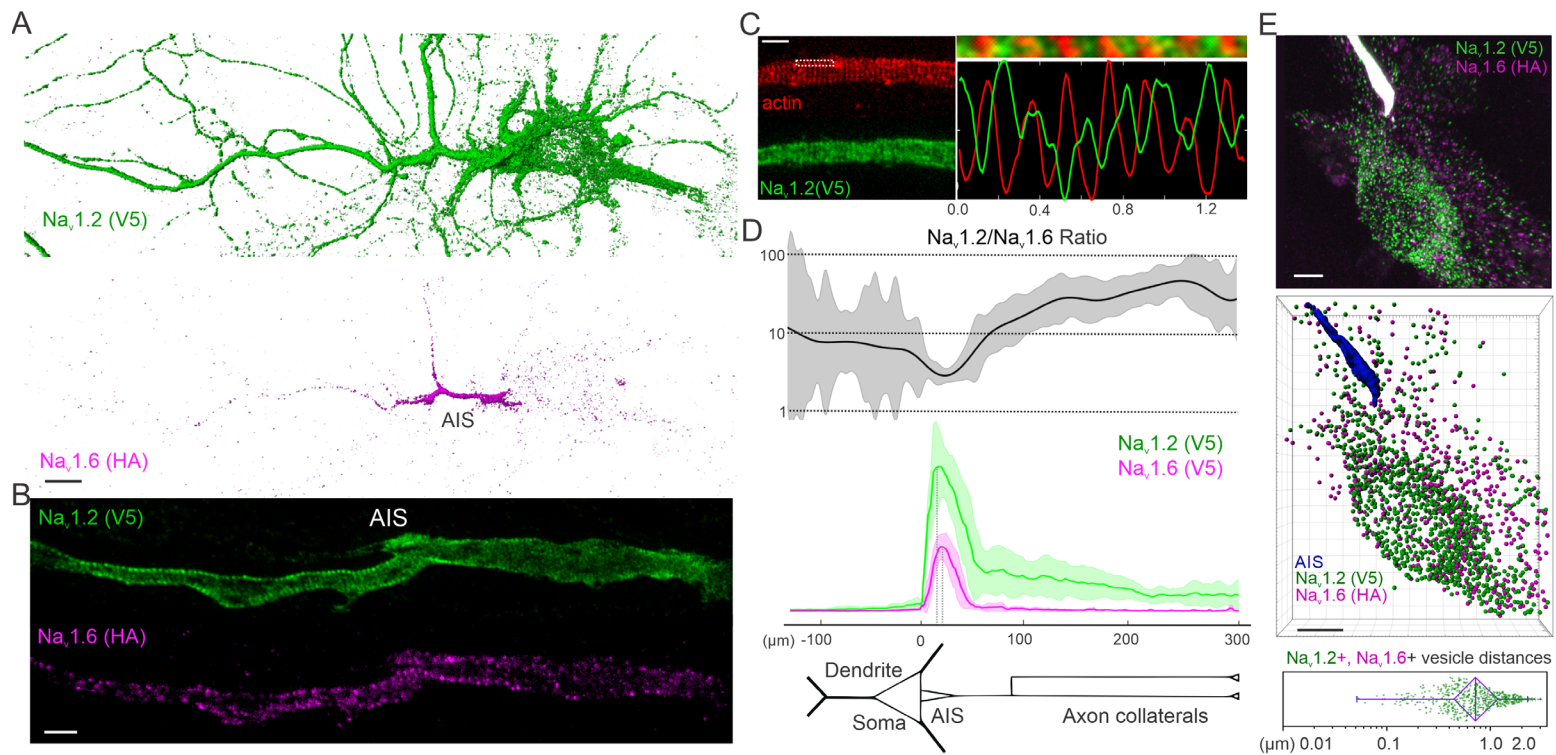

458

459 **Figure 1 Sub-cellular distributions of Nav1.2 and Nav1.6 in cultured hippocampal neurons.**

460 (A) Labeling of Nav<sub>v</sub>1.2 with V5 tag and Nav<sub>v</sub>1.6 with HA tag in the same neuron. Scale bar, 10 μm.

461 (B) Super-resolution STED imaging of labeled Nav<sub>v</sub>1.2 and Nav<sub>v</sub>1.6 in the AIS region. Scale bar, 1

462 μm. (C) Anti-phase periodic striations of V5-labeled Nav<sub>v</sub>1.2 and actin in the AIS region. The top

463 image on the right shows a zoom-in view of the rectangle region with dashed lines in the left image.

464 Bottom shows the intensity curves of Nav<sub>v</sub>1.2 (green) and actin (red) along the horizontal line. Scale

465 bar, 1 μm. (D) Analysis of Nav<sub>v</sub>1.2 (n = 12) and Nav<sub>v</sub>1.6 (n = 14) relative intensities along the

466 dendrite and axon of cultured hippocampal neurons (Figure 1-source data 1). The top curve shows

467 the Nav<sub>v</sub>1.2/Nav<sub>v</sub>1.6 intensity ratio calculated by using Nav<sub>v</sub>1.2 and Nav<sub>v</sub>1.6 intensity data shown in

468 the middle panel. Error bars (shadow areas) represent SD. (E) Airyscan imaging of Nav<sub>v</sub>1.2- and

469 Nav<sub>v</sub>1.6-positive vesicles in the soma. The middle panel shows computer aided segmentation of

470 Nav<sub>v</sub>1.2 and Nav<sub>v</sub>1.6 vesicles and the bottom box chart shows the distribution of physical distances

471 between these two vesicle populations (Figure 1-source data 2). Scale bar, 5 μm. In the box chart,

472 right and left error bars represent 95% and 5% percentile, respectively; triangle represents the

473 range from 25% to 75% percentile; center line represents the median.



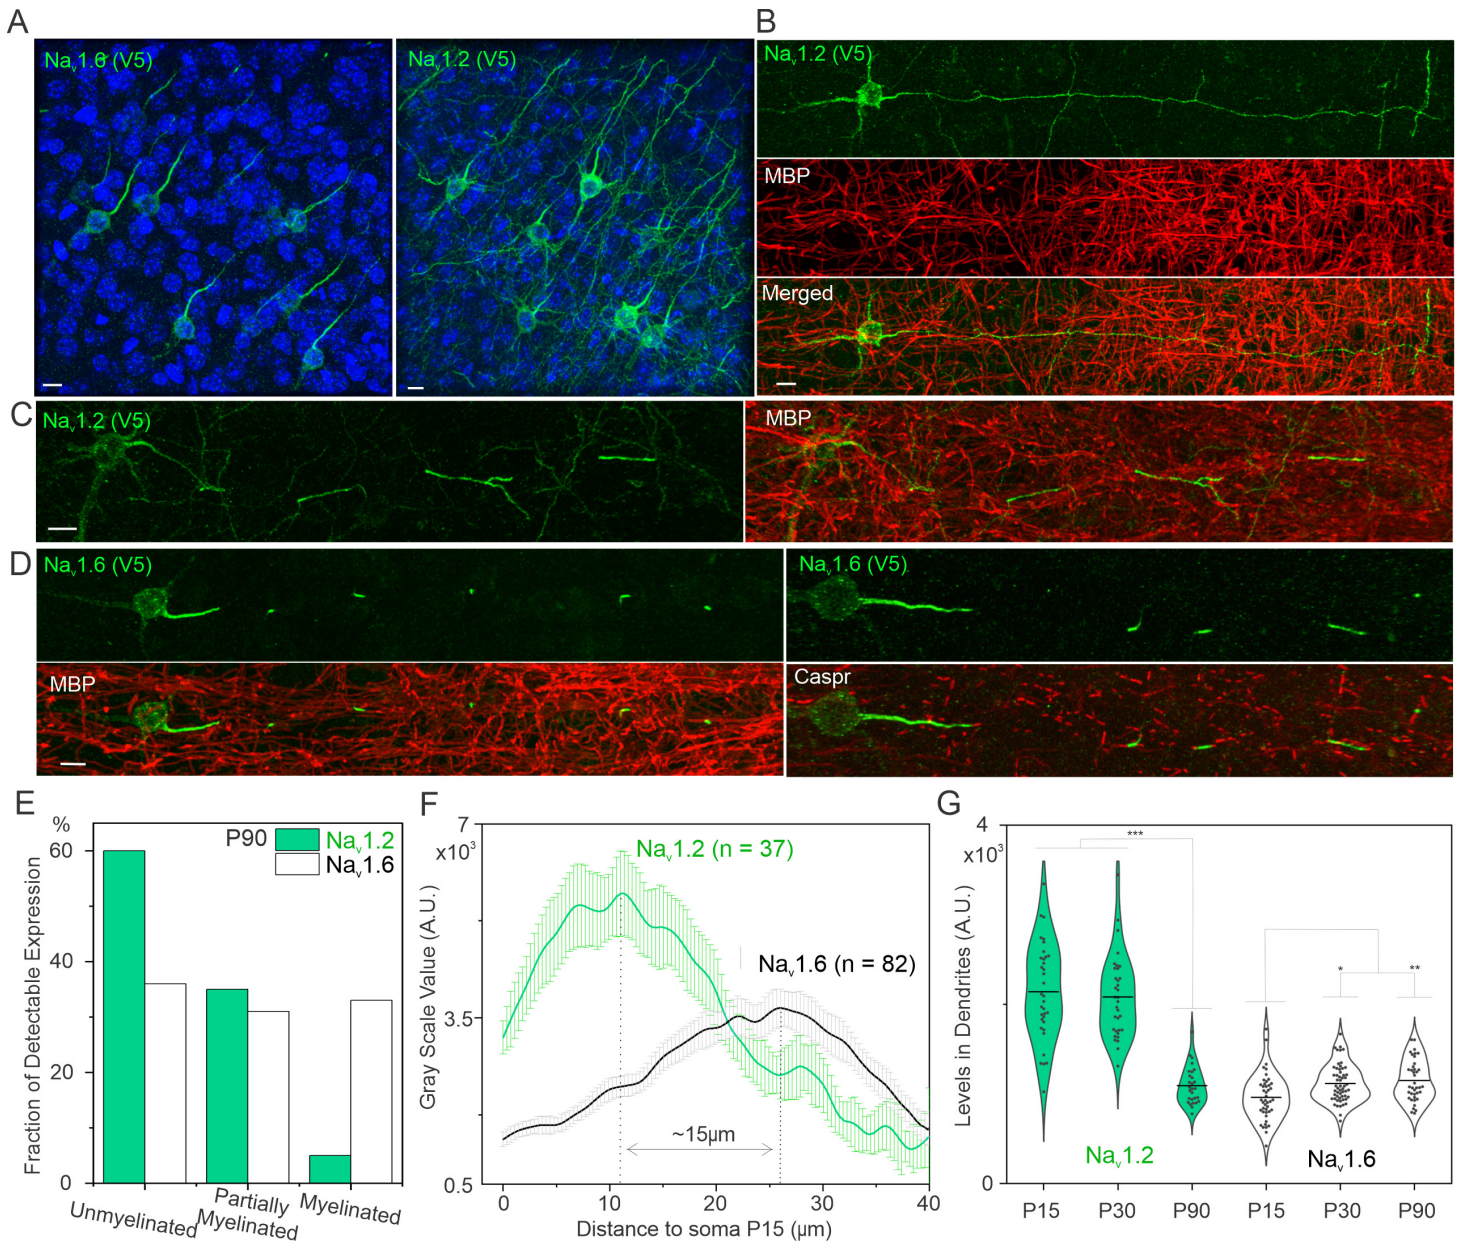

474

475 **Figure 2 Developmental regulation of Nav1.2 and Nav1.6 localization and expression in the**  
476 **brain.**

477 (A) Representative images of Nav1.2 and Nav1.6 labeled with V5 tag in the cortex. Blue channel  
478 shows the Hoechst stain. Scale bar, 10  $\mu$ m. (B and C) Double-immunostaining of V5-labeled  
479 Nav1.2 with MBP (red) in unmyelinated neuron (B) and partially myelinated neuron (C). Scale  
480 bar, 10  $\mu$ m. (D) Double-immunostaining of V5-labeled Nav1.6 with MBP (left) and Caspr (right).  
481 Scale bar, 10  $\mu$ m. (E) The percentage of unmyelinated, partially myelinated, and myelinated  
482 neurons in Nav1.2- or Nav1.6-positive knockin neurons. The number of cells analyzed: Nav1.2, 60;  
483 Nav1.6, 97. (F) Intensity measurements of V5-labeled Nav1.2 and Nav1.6 in the AIS of cortical  
484 neurons at P15 (Figure 2-source data 1). Error bars represent SEM; n indicates the number of cells  
485 analyzed. (G) Violin plots of intensity measurements of V5-labeled Nav1.2 and Nav1.6 in dendrites  
486 of cortical neurons at different ages (Figure 2-source data 2). In the graph, the line represents the  
487 mean. \*,  $p$ -value < 0.05; \*\*,  $p$ -value < 0.01; \*\*\*,  $p$ -value < 0.001.

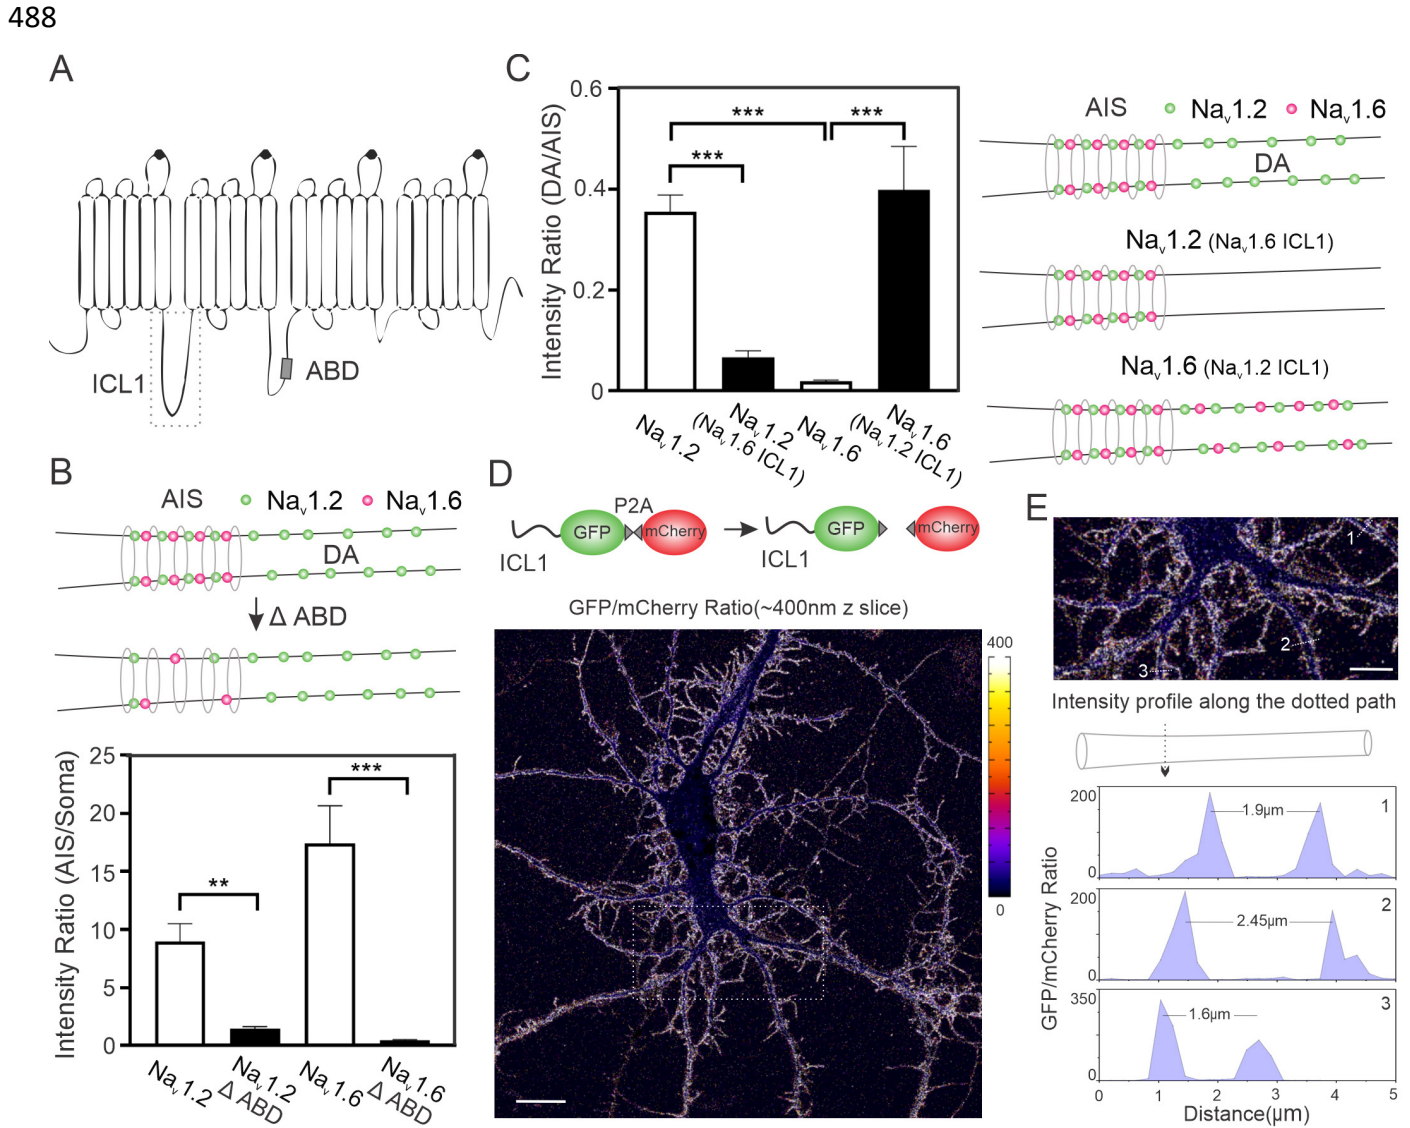



489 **Figure 3 Compartment-specific targeting mechanisms for Nav1.2 and Nav1.6.**

490 (A) Rectangle region with dashed lines shows the ICL1 region of Nav<sub>v</sub>1.2 and Nav<sub>v</sub>1.6. ABD is  
491 indicated by a small gray rectangle. (B) Deletion of ABD abolished enrichment of Nav<sub>v</sub>1.2 and  
492 Nav<sub>v</sub>1.6 in AIS. Top shows the cartoon demonstration and bottom shows the statistical analysis of  
493 the intensity ratio between AIS and soma after ABD deletion (Figure 3-source data 1). (C) Nav<sub>v</sub>1.2  
494 with Nav<sub>v</sub>1.6 ICL1 showed dramatic less enrichment in the distal axon. Conversely, Nav<sub>v</sub>1.6 with  
495 Nav<sub>v</sub>1.2 ICL1 gains the ability to localize to the distal axon. Left shows the statistical analysis of  
496 the intensity ratio between distal axon and soma of Nav<sub>v</sub>1.2 or Nav<sub>v</sub>1.6 after ICL1 replacement  
497 (Figure 3-source data 2) and right shows the cartoon demonstration. Error bars represent SEM. \*\*,  
498  $p$ -value < 0.01; \*\*\*,  $p$ -value < 0.001. (D) Top shows the illustration of the ratiometric localization  
499 analysis. After translation, ICL1-GFP and mCherry proteins are separated due to ribosome  
500 skipping at P2A. A representative intensity ratio (Nav<sub>v</sub>1.2 ICL1-GFP/mCherry) image showed the  
501 localization of Nav<sub>v</sub>1.2 ICL1 to membrane. Right color bar indicates the ratio level. Scale bar, 20  
502  $\mu$ m. (E) Top shows the enlarged view of the rectangle region with dashed lines in (D). Three  
503 neurites were chosen to analyze their intensity profiles along the dotted paths, of which the results  
504 were shown below. Scale bar, 10  $\mu$ m.

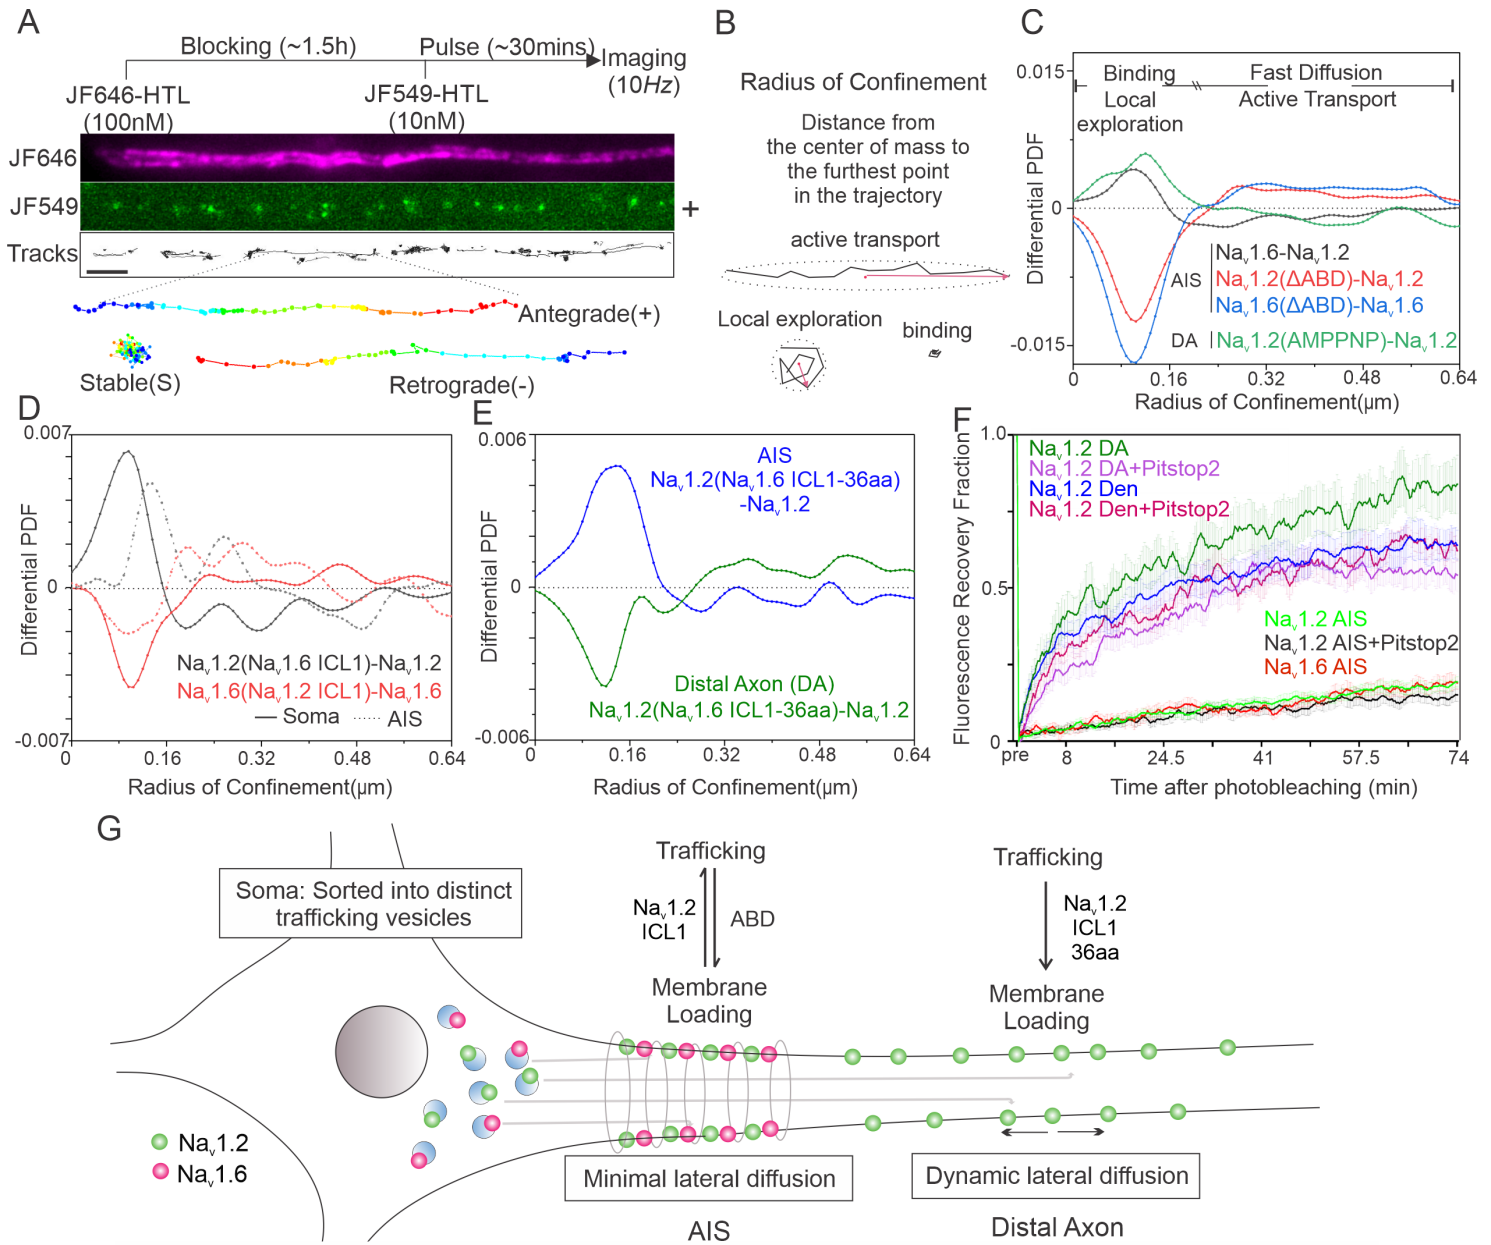

505

506 **Figure 4 Live Imaging of Nav1.2 and Nav1.6 trafficking and lateral diffusion dynamics.**

507 (A) Pulse-chase single molecule imaging of Nav1.2 and Nav1.6. Top shows the experimental  
508 flowchart. Middle shows a representative AIS image, with JF646 bulk labeling image, JF549  
509 pulse-chased single molecule signals and analyzed single molecule moving trajectories. Bottom  
510 shows three different types of trajectories: stable binding, anterograde and retrograde movement  
511 (blue to red color change represents time progression). (B) Definition of Radius of Confinement  
512 (RC) for analyzing single molecule moving dynamics. Stable binding and local exploration events  
513 have smaller RCs, whereas active transport and fast diffusion events should have larger RCs. (C)  
514 Comparative RC distribution curves of Nav1.6 - Nav1.2 (black curve), Nav1.2( $\Delta$ ABD) - Nav1.2  
515 (red curve), Nav1.6( $\Delta$ ABD) - Nav1.6 (blue curve) in the AIS region and Nav1.2(AMPPNP) - Nav1.2  
516 (green curve) in the distal axon (Figure 4-source data 1). Differential PDF = 0 stands for equal  
517 fraction. (D) Comparative RC distribution curves of Nav1.2(Nav1.6 ICL1) - Nav1.2 (black curve)  
518 and Nav1.6(Nav1.2 ICL1) - Nav1.6 (red curve) in soma (solid line) and AIS (dotted line) (Figure  
519 4-source data 2). (E) Comparative RC distribution curves of Nav1.2(Nav1.6 ICL1-36aa) - Nav1.2  
520 in AIS (blue) and distal axon (green) (Figure 4-source data 3). (F) Fluorescent recovery curves of  
521 Nav1.2 and Nav1.6 in different neuronal compartments after photobleaching (Figure 4-source data  
522 4). Pitstop 2 (30  $\mu$ M) was added to inhibit endocytosis during the labeling and imaging period.  
523 Error bars represent SEM. (G) A cartoon model showing that Nav1.2 ICL1 is important for  
524 suppressing AIS anchoring and facilitating membrane insertion at the distal axon.

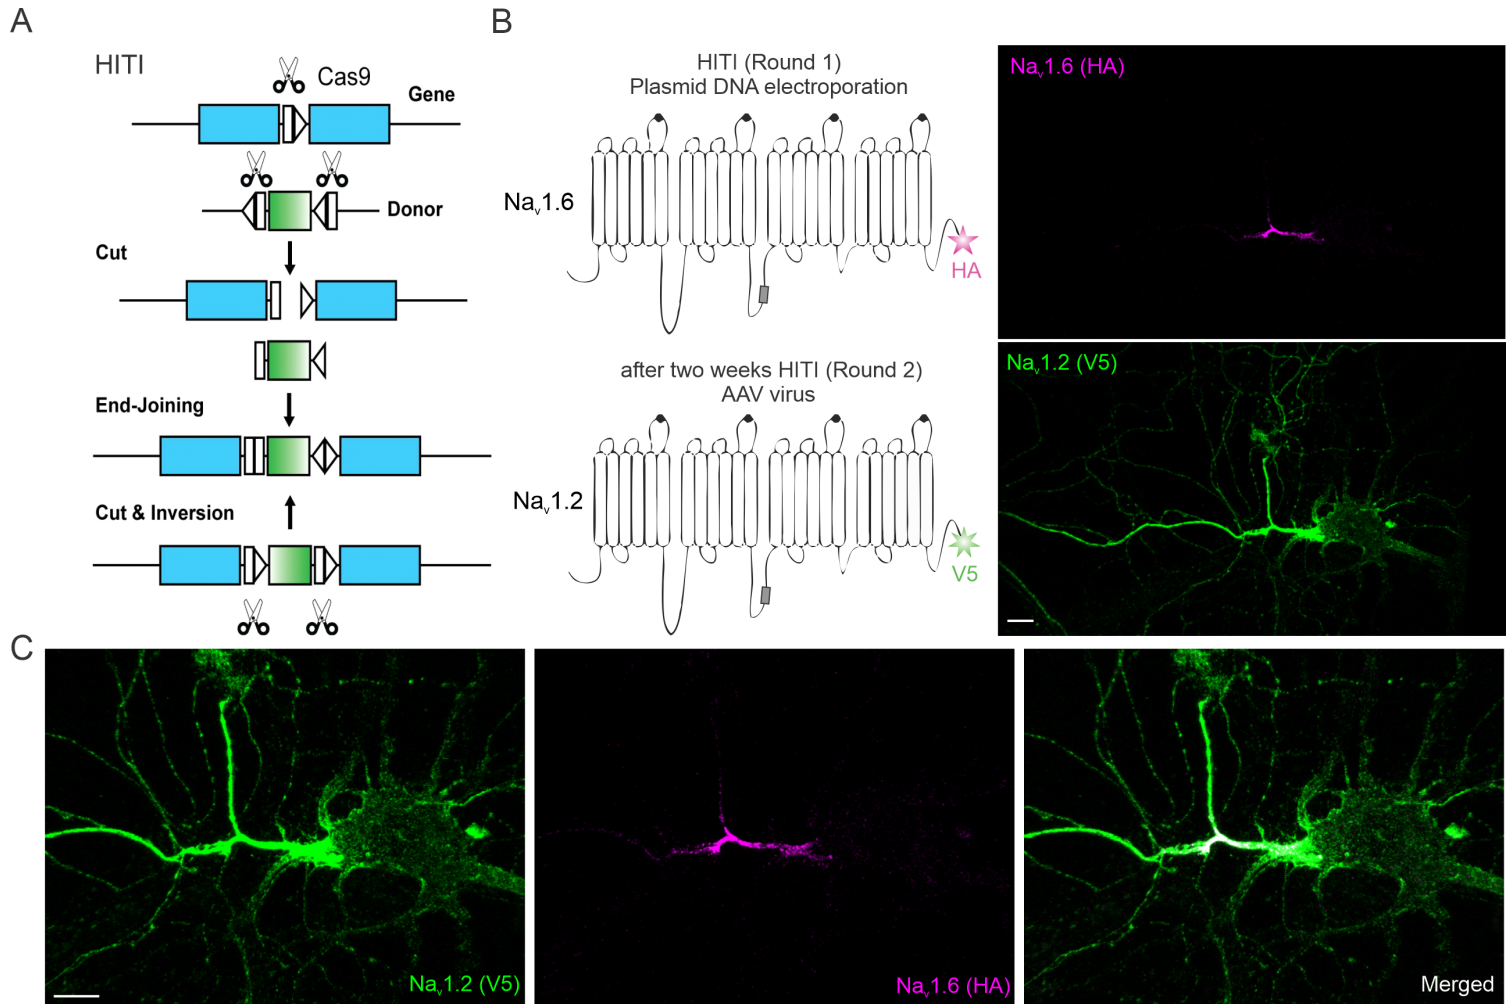

525

526 **Figure 1-figure supplement 1 The HITI knock-in strategy and dual labeling of Nav1.2 and**  
527 **Nav1.6 in the same neuron.**

528 (A) The schematics for the HITI strategy. The donor DNA fragment has two gRNA cutting sites  
529 flanking the tag cDNA. After cutting and end-joining, if the fragment is inserted into the genome  
530 in the right direction, the two gRNA cutting sites will be inactivated. If not, the cutting and end-  
531 joining process will continue until it is inserted in the right direction. (B) The strategy of double-  
532 labeling Nav1.2 and Nav1.6 in the same neuron (left). Through sequential plasmid DNA  
533 electroporation and AAV virus infection two weeks later, double-labeling of Nav1.2 and Nav1.6 in  
534 the same neuron is achieved. The neuron in **Figure 1A** is shown in a larger field of view on the  
535 right. (C) Zoom-in views of the soma, dendrite and AIS region of the example neuron. Scale bar  
536 in (B) and (C), 10  $\mu\text{m}$ .



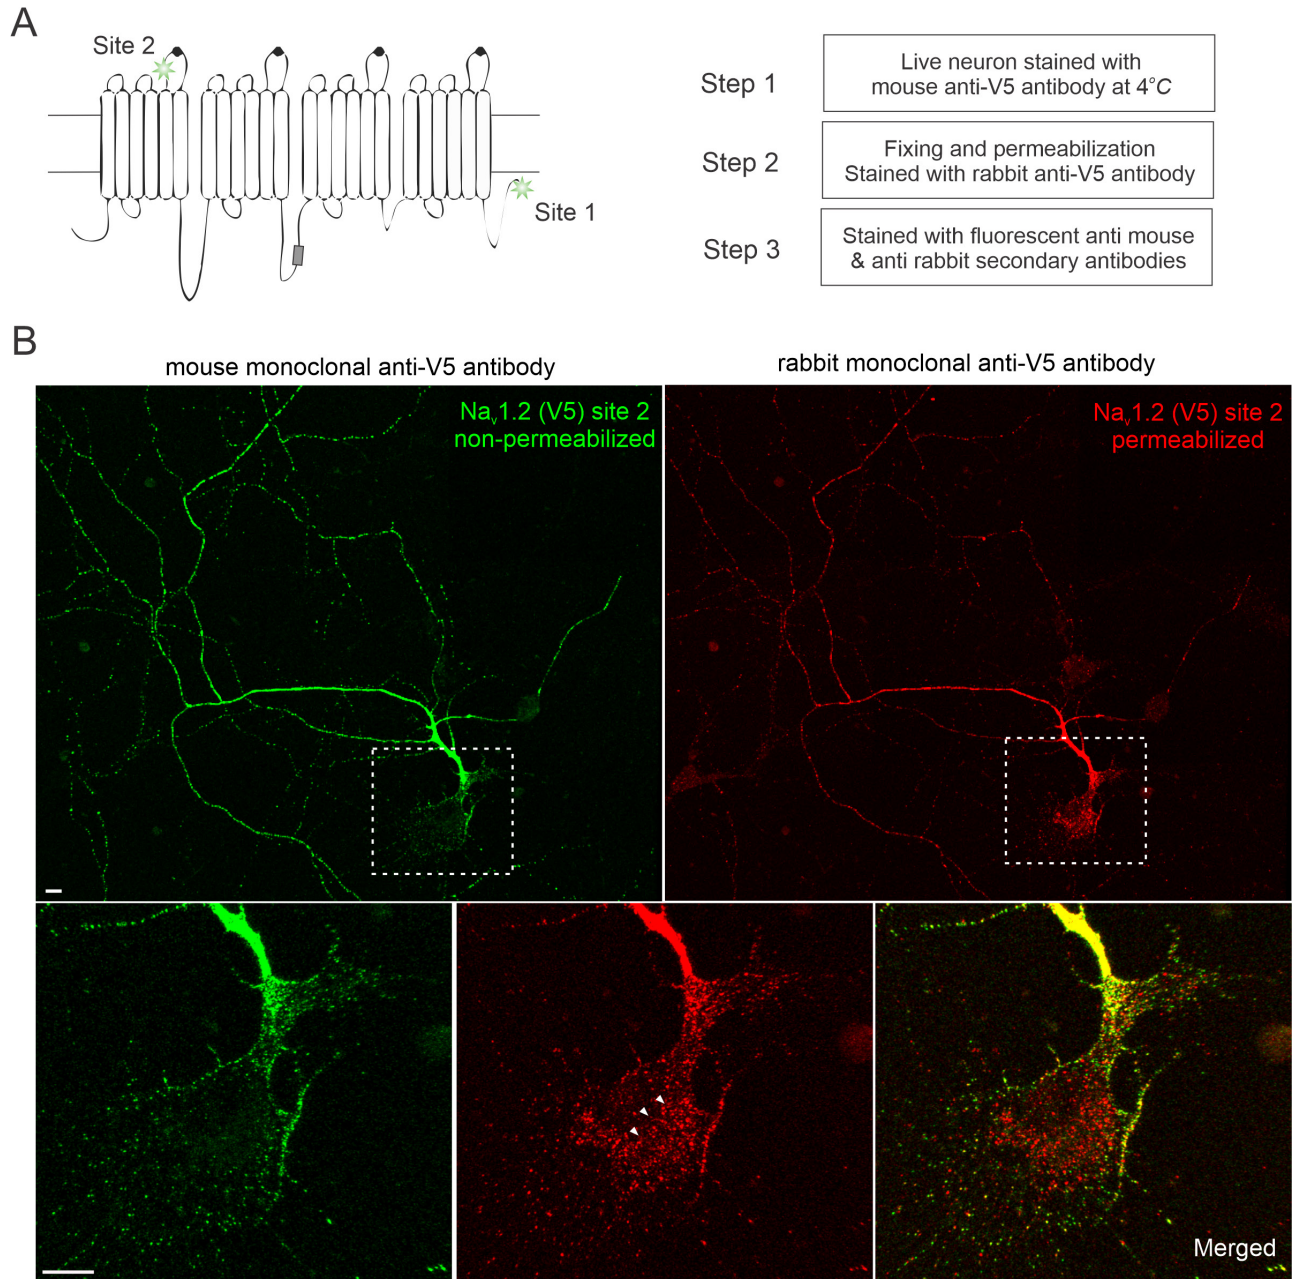

537

538 **Figure 1-figure supplement 2 Non-permeabilized staining of Nav1.2 confirms its membrane**  
539 **localization at the distal axon and dendrites.**

540 (A) Left shows two gRNA targeting sites of Nav<sub>v</sub>1.2 used in this study. Site 2 is at the extracellular  
541 loop between segment 5 and 6 of domain I. With V5 insertion at this site, we performed three-step  
542 staining shown in the right protocol. (B) Non-permeabilized (green) and permeabilized staining  
543 (red) images of Nav<sub>v</sub>1.2 in the same neuron. Bottom images are zoom-in views of the soma region  
544 (rectangle region with dashed lines). Arrowheads indicate labeled intracellular Nav<sub>v</sub>1.2 vesicles (red)  
545 which were absent in the non-permeabilized staining (green). Scale bar, 10 μm.

546

547

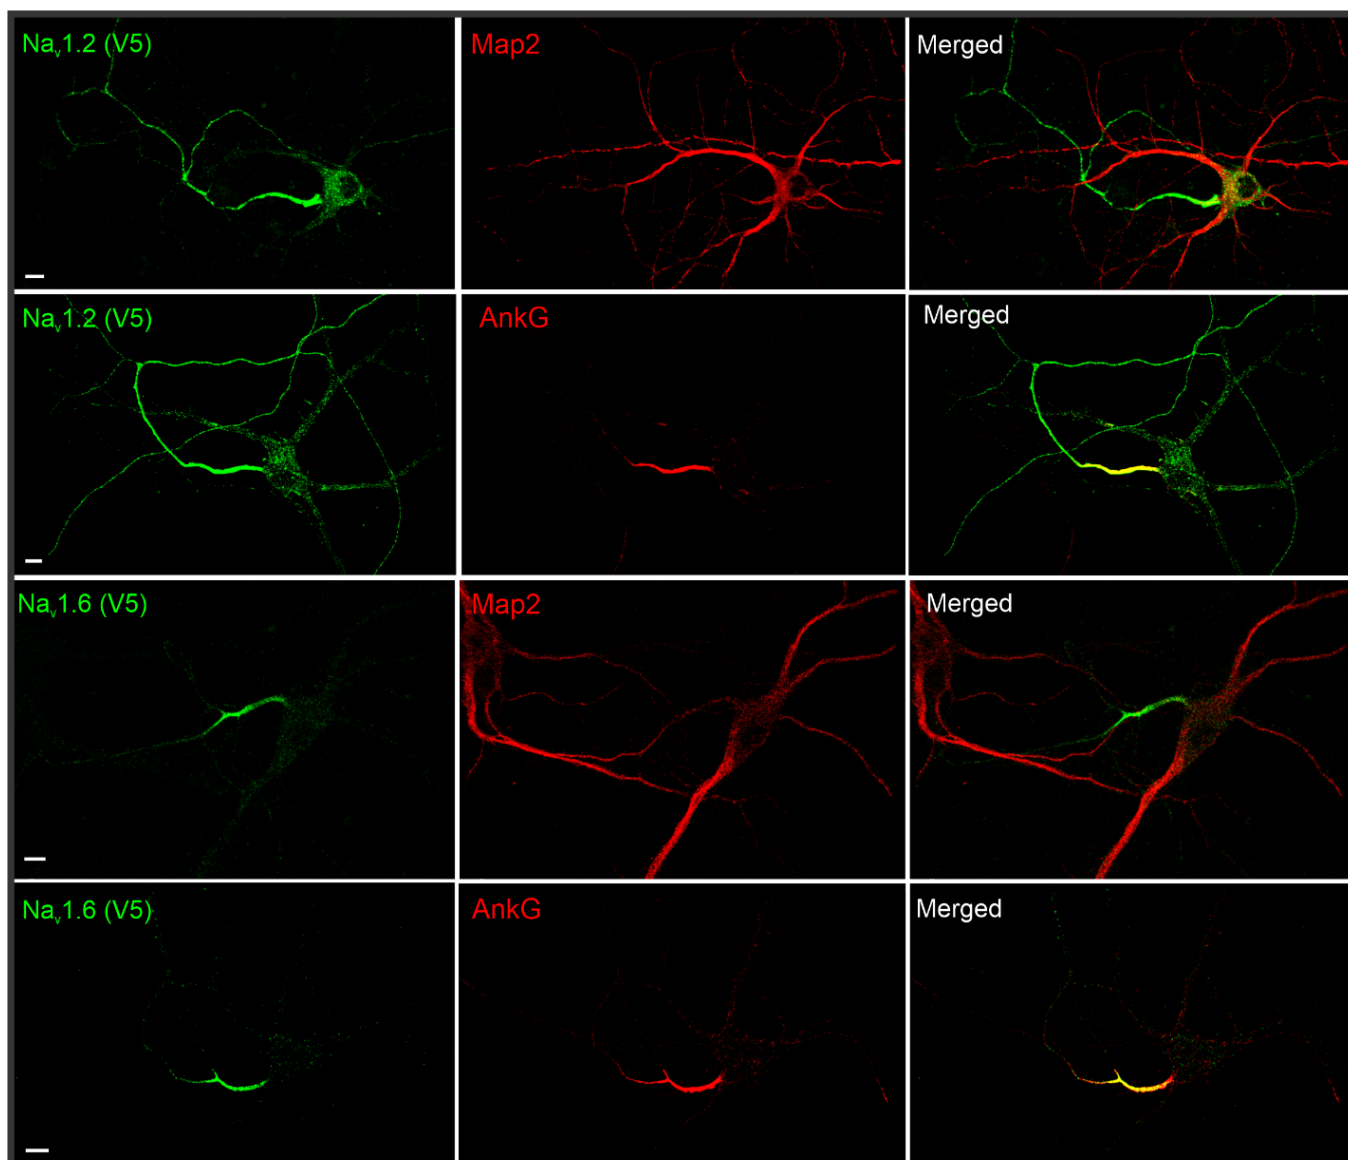



548 **Figure 1-figure supplement 3 Immunostaining of V5-labeled Nav1.2 and Nav1.6 with MAP2**  
549 **or AnkG in cultured hippocampal neurons.**

550 By cross referencing with dendrite (MAP2) and AIS (AnkG) markers, we found that Nav<sub>v</sub>1.2 is  
551 enriched in AIS, distal axon and dendrites, whereas Nav<sub>v</sub>1.6 is mainly localized in the AIS region.

552 Scale bar, 10  $\mu$ m.

**A**

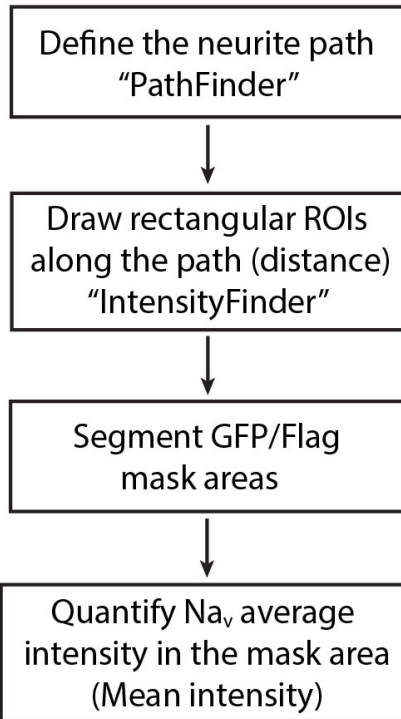

553

**B**

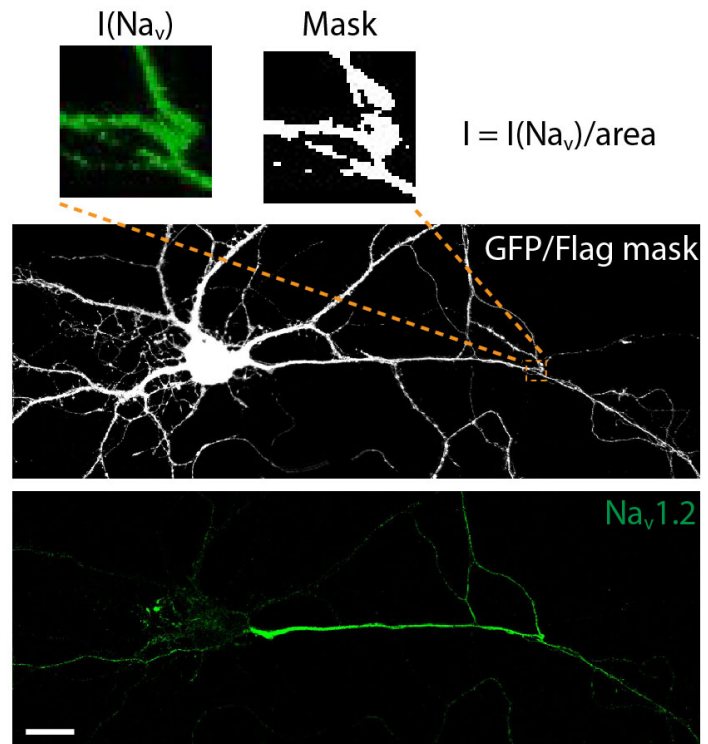

554 **Figure 1-figure supplement 4 An analysis pipeline for estimating Nav1.2 and Nav1.6 sub-**  
555 **cellular abundance.**

556 (A) First, the analysis pipeline defines the neurite path (axon and dendrite); secondly, ROIs were  
557 selected along the path with the calculation of their distances from the soma; lastly, the program  
558 segments GFP/Flag mask areas and quantifies Nav average intensities in the neurites within each  
559 ROI (Figure 1-figure supplement 4-source code 1, 2). (B) An example showing segmentation and  
560 quantification in one ROI. The mean intensity is calculated through normalization of total Nav  
561 intensity with the mask area. Scale bar, 20  $\mu\text{m}$ .

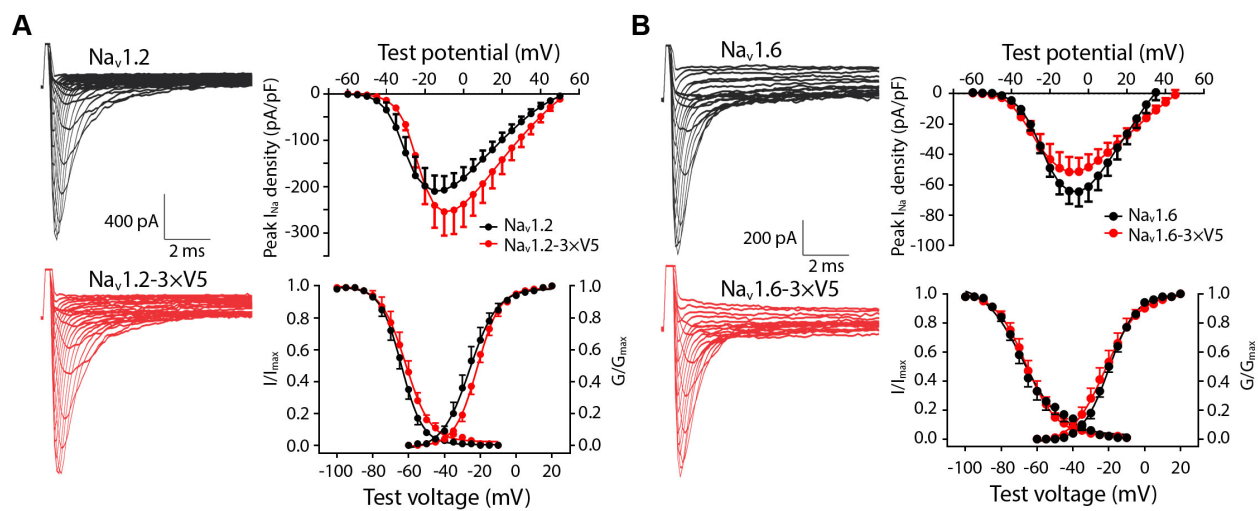

562

563 **Figure 1-figure supplement 5 Electrophysiological properties of wild type and V5-labeled**  
564 **Nav1.2 and Nav1.6 in HEK293T cells.**

565 **(A)** *WT* (black) and V5-labeled (red) Nav1.2. Left: Nav1.2 current examples; right: peak current  
566 density (upper), channel activation (*WT*, n = 10; V5-labeled, n = 9) and steady-state inactivation  
567 (*WT*, n=11; V5-labeled, n = 9) curves (lower). **(B)** *WT* (black) and V5-labeled (red) Nav1.6. Left:  
568 Nav1.6 current examples; right: peak current density (upper), channel activation (*WT*, n = 11; V5-  
569 labeled, n = 12) and steady-state inactivation (*WT*, n = 13; V5-labeled, n = 11) curves (lower). See  
570 in Figure 1-figure supplement 5-source data 1.

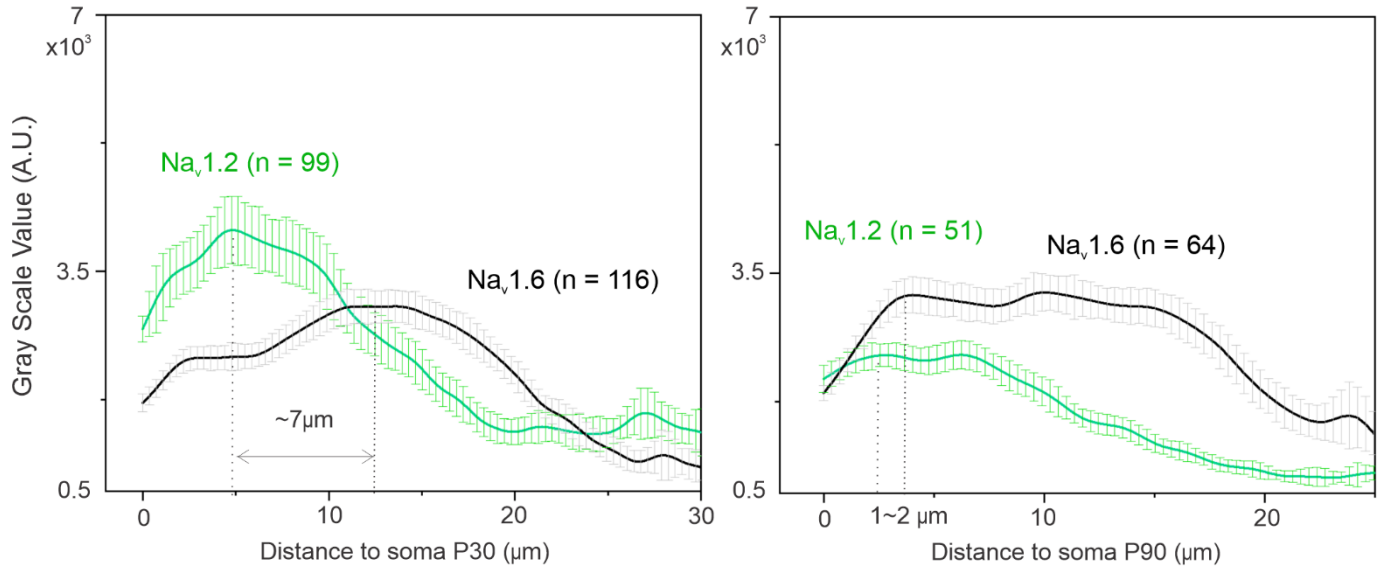

571

572 **Figure 2-figure supplement 1 The distribution profiles of Nav1.2 and Nav1.6 along the AIS of**  
573 **mouse cortical neurons at P30 and P90.**

574 From P15 (**Figure 2F**) to P90, Nav1.2 levels in AIS gradually decrease and the concentration peak  
575 of Nav1.6 shift inwards, moving closer to the Nav1.2 concentration peak located at the proximal  
576 AIS. See in Figure 2-figure supplement 1-source data 1, 2. Error bars represent SEM; n indicates  
577 the number of cells analyzed.



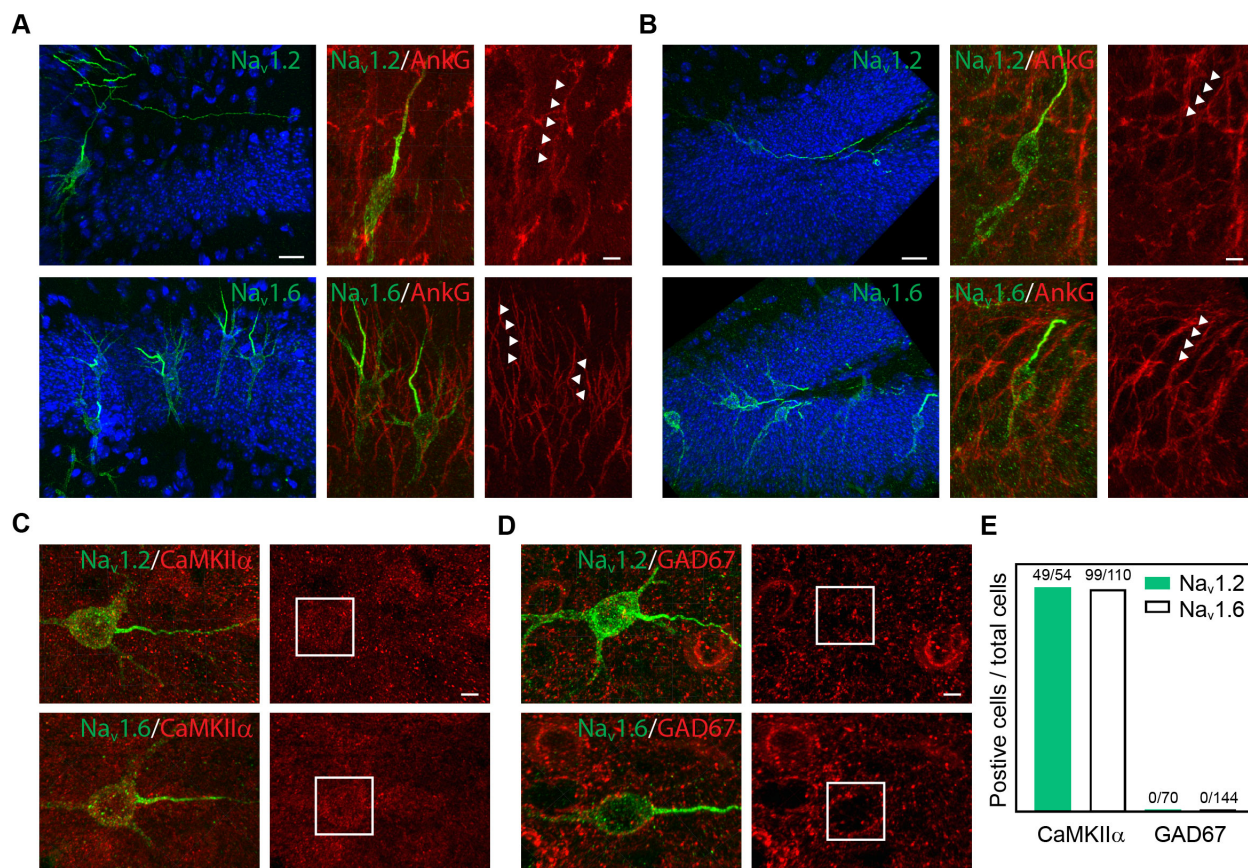

578

579 **Figure 2-figure supplement 2 Cell-type specific expression of Nav1.2 and Nav1.6 in the mouse**  
580 **brain.**

581 (A) and (B) Representative images of Nav1.2 and Nav1.6 labeled with V5 tag in CA1 (A) and  
582 dentate gyrus (B) of the hippocampus. Left: Blue channel shows the Hoechst stain. Scale bar, 20  
583  $\mu\text{m}$ . Right: Zoom-in images co-stained with AnkG. Arrowheads indicate Nav1.2 or Nav1.6-positive  
584 region with AnkG signals. Scale bar, 5  $\mu\text{m}$ . (C) and (D) Double-immunostaining of V5-labeled  
585 Nav1.2 or Nav1.6 with CaMKII $\alpha$  (C) or GAD67 (D) in the mouse cortex. Rectangles highlight the  
586 soma regions of Nav1.2 or Nav1.6-positive neurons. Scale bar, 5  $\mu\text{m}$ . (E) The positive ratio of  
587 Nav1.2 or Nav1.6 knockin cells in CaMKII $\alpha$ -positive excitatory or GAD67-positive inhibitory  
588 neurons.

A

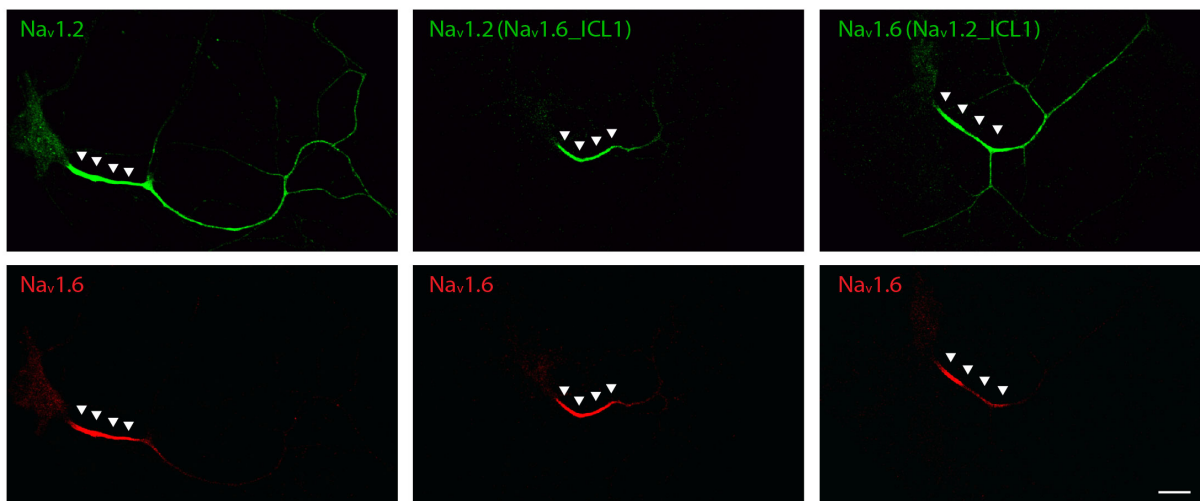

B

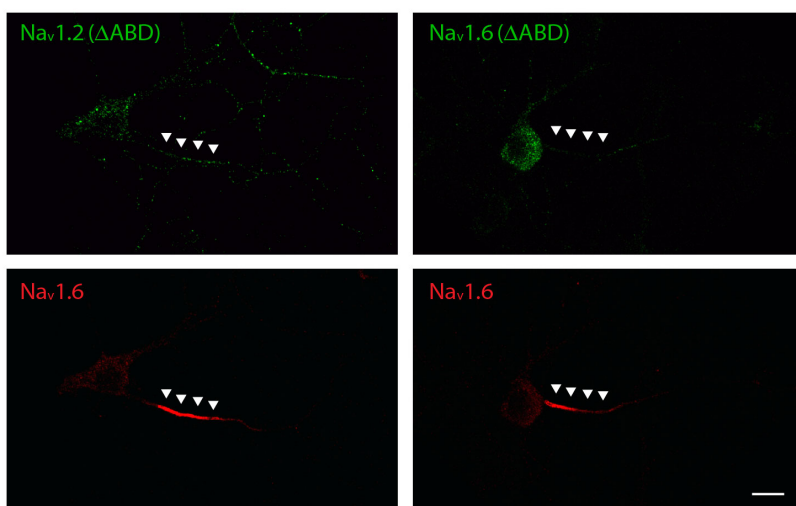

589

590 **Figure 3-figure supplement 1 Localization of Nav1.2 to the distal axon requires ICL1.**

591 (A) Left: localization patterns of wild-type Nav1.2 (green) and Nav1.6 (red). Middle: Nav1.2 with  
592 Nav1.6 ICL1 showed minimal enrichment at the distal axon. Right: Nav1.6 with Nav1.2 ICL1  
593 gained access to the distal axon. (B) ABD deletion greatly reduced Nav1.2 and Nav1.6 levels at the  
594 AIS. Arrowheads indicate the AIS region. Scale bar, 20  $\mu$ m.

**A**

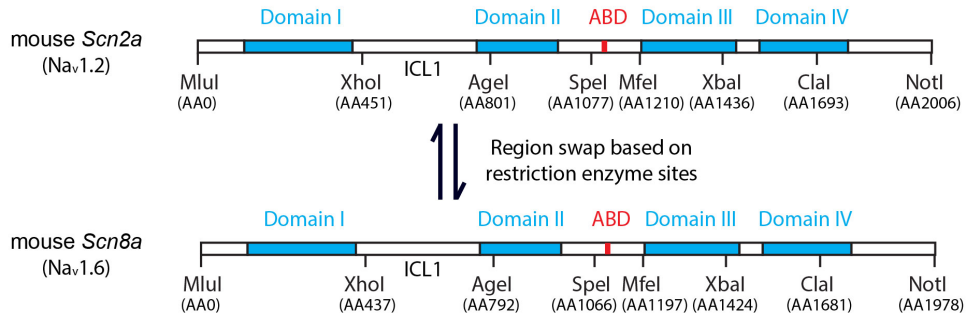

**B**

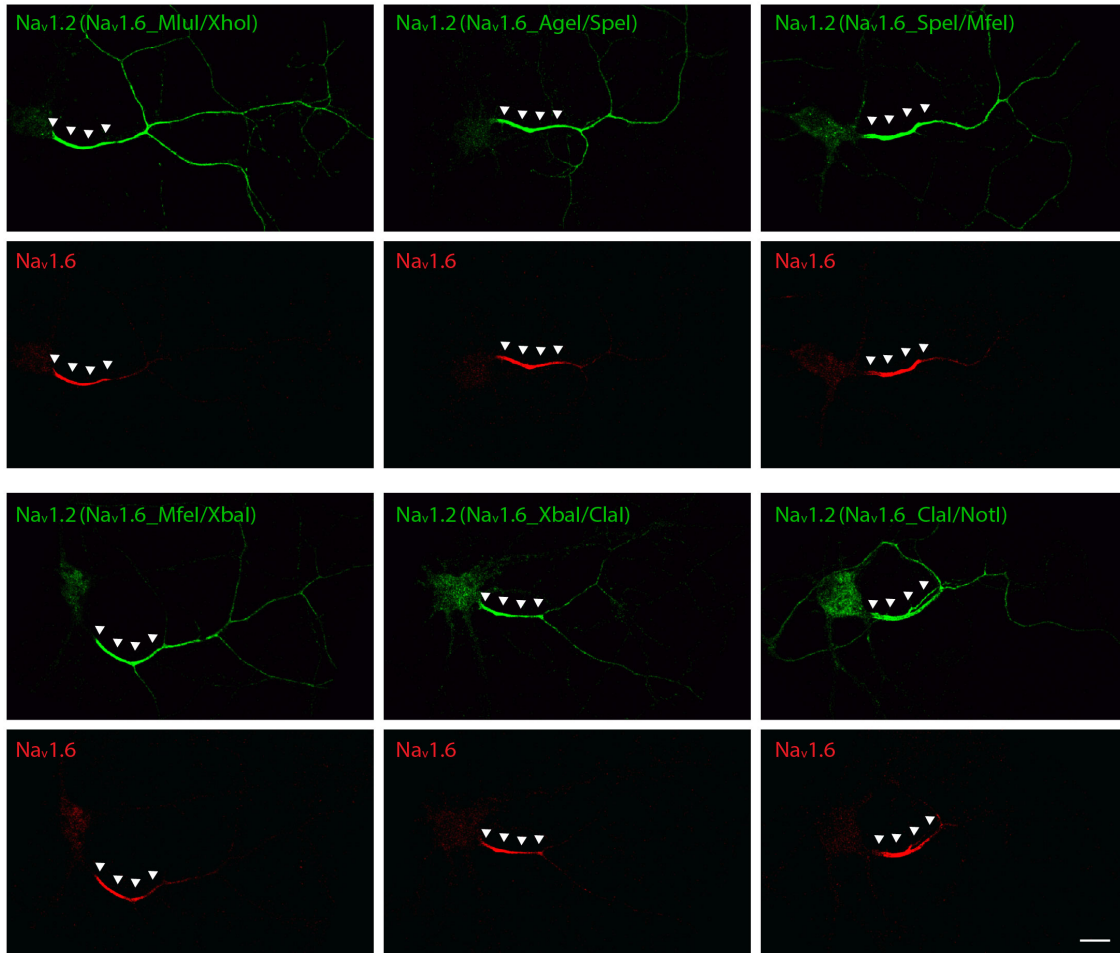

**C**

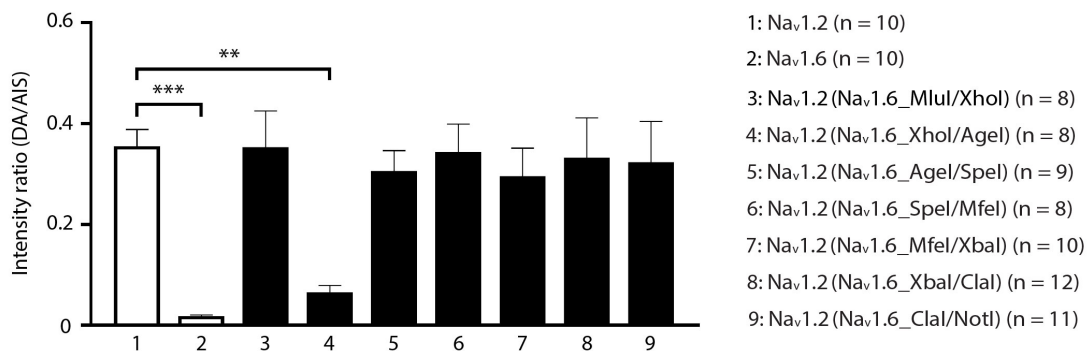

596 **Figure 3-figure supplement 2 Identification of the domain required for the localization of**  
597 **Nav1.2 to the distal axon.**

598 (A) Eight restriction enzyme sites were designed in both mouse *Scn2a* (Nav<sub>v</sub>1.2) and *Scn8a* (Nav<sub>v</sub>1.6)  
599 cDNA without altering their protein sequences. Subcloning was used to swap corresponding  
600 regions between Nav<sub>v</sub>1.2 and Nav<sub>v</sub>1.6. ICL1 is indicated in the graph, which could be exchanged  
601 with XhoI and AgeI. (B) Swapping the regions other than ICL1 domain (XhoI and AgeI) did not  
602 affect Nav<sub>v</sub>1.2 localization in the distal axon (green). ICL1 representative images are shown in  
603 **Figure 3-figure supplement 1A**. Arrowheads indicate the AIS region. Scale bar, 20 μm. (C)  
604 Analysis of the intensity ratio between distal axon and AIS of Nav<sub>v</sub>1.2 with swapped domains from  
605 Nav<sub>v</sub>1.6 (Figure 3-figure supplement 2-source data 1). Error bars represent SEM. \*\*\*, *p*-value <  
606 0.001; \*\*, *p*-value < 0.01.



607

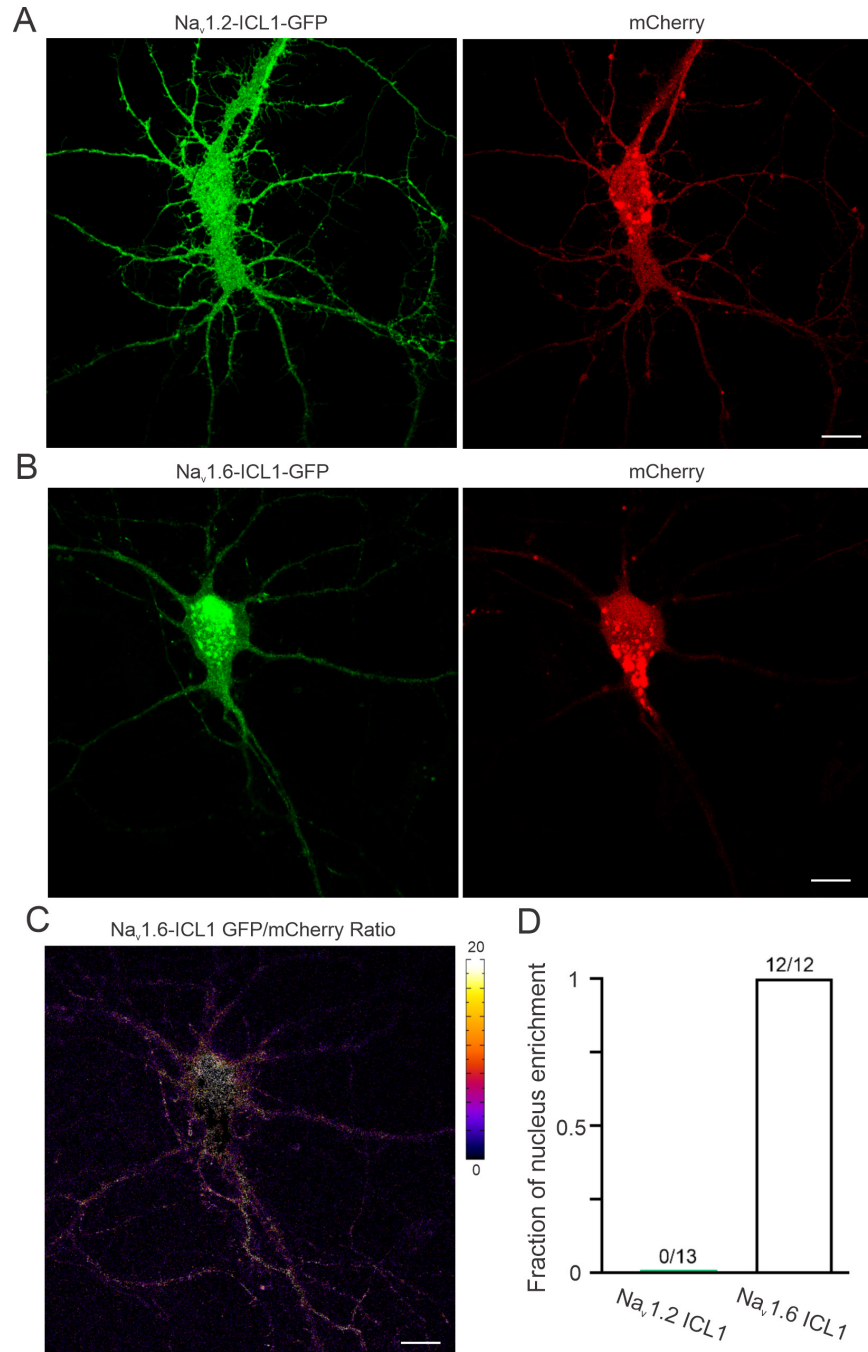



608 **Figure 3-figure supplement 3 Nav1.2 ICL1 and Nav1.6 ICL1 target GFP to membrane and**  
609 **the nucleus respectively.**

610 (A) and (B) Representative raw images of Nav1.2 (A) and Nav1.6 (B) ICL1-GFP and  
611 corresponding mCherry signals. (C) Intensity ratio image of Nav1.6 ICL1-GFP/mCherry shown in  
612 (B) suggests a nucleus enrichment of Nav1.6-ICL1-GFP. Right color bar indicates the ratio level.  
613 (D) The percentage of neurons showed nucleus localization of GFP signals. Scale bar (A - C), 20  
614  $\mu\text{m}$ .

615

A

```
Nav1.2 423 VVAMAYEEQNQATLEEAQEKEAEFQMLEQLKKQEEEAQAAAASAEVSRDFSAA---GGIGVFS-ESSVA SKLSSKSEKELKNNRKKKQKEQNGEEK--EAVRKSASEDSTRKRG
Nav1.6 409 VVAMAYEEQNQATLEEAQEKEAEFKAMLEQLKKQEEEAQAAAAMTSAGTVSEDAIEEEGEDGVGSPRSSSEL SKLSSKSAKERSNNRKKKQKELSEGEKGDPEKVFKSEEDGHRKA
Consensus VVAMAYEEQNQATLEEAQEKEAEF MLEQLKKQEEEAQAAA A SA S A G GV S SSS SKLSSKS KE KNRRKKKKQKE A EEK D V KS SED IRKKA

Nav1.2 543 FFSLGSRSLTYEKRFS SPHQSLLSIRGSLFSPRRNSRASVFSFRG---RVVDIGSENDFADDEHSTFFINDSRRDLSLFFPHRHGERRP-----NVSQASRRSRGIPTLPMNGMHSAVD
Nav1.6 529 FFLPDN----RIGRFSIMNQSLLSIPGSPFLSRHNSKSTVFSFRGPGRFVDPGSENFADDEHSTVSESGRRDLSLFFPHARERRSSYSGYGYQCRRSRIFPSLRRSVKRNSTVD
Consensus FR KKFS QLLSI GS F R NSKASIFSFKG R KD GSENFADDEHST ED D RRDSLFIPI R ERR S SQ SRASR PSL K S VD

Nav1.2 663 CNGVYSLVSGF SALTSPYQQLLPEGITTEIRKFRSSVYHYSMDLEDPTSQRAMSNALITN-TVEELESQRKCPPCWYKFANMCLINCCRPFLVYHVNLYVMDB 760
Nav1.6 649 CNGVYSLVSGF SALTSPYQQLLPEGITTEIRKFRSSVYHYSMDLEDPTSQRAMSNALITN-TVEELESQRKCPPCWYKFANMCLINCCRPFLVYHVNLYVMDB 751
Consensus CNGVYSLVSGF SALTSPYQQLLPEGITTEIRKFRSSVYHYSMDLEDPTSQRAMSNALITN-TVEELESQRKCPPCWYKFANMCLINCCRPFLVYHVNLYVMDB
```

B

Na<sub>v</sub>1.2-ICL1-36aa GFP/mCherry Ratio

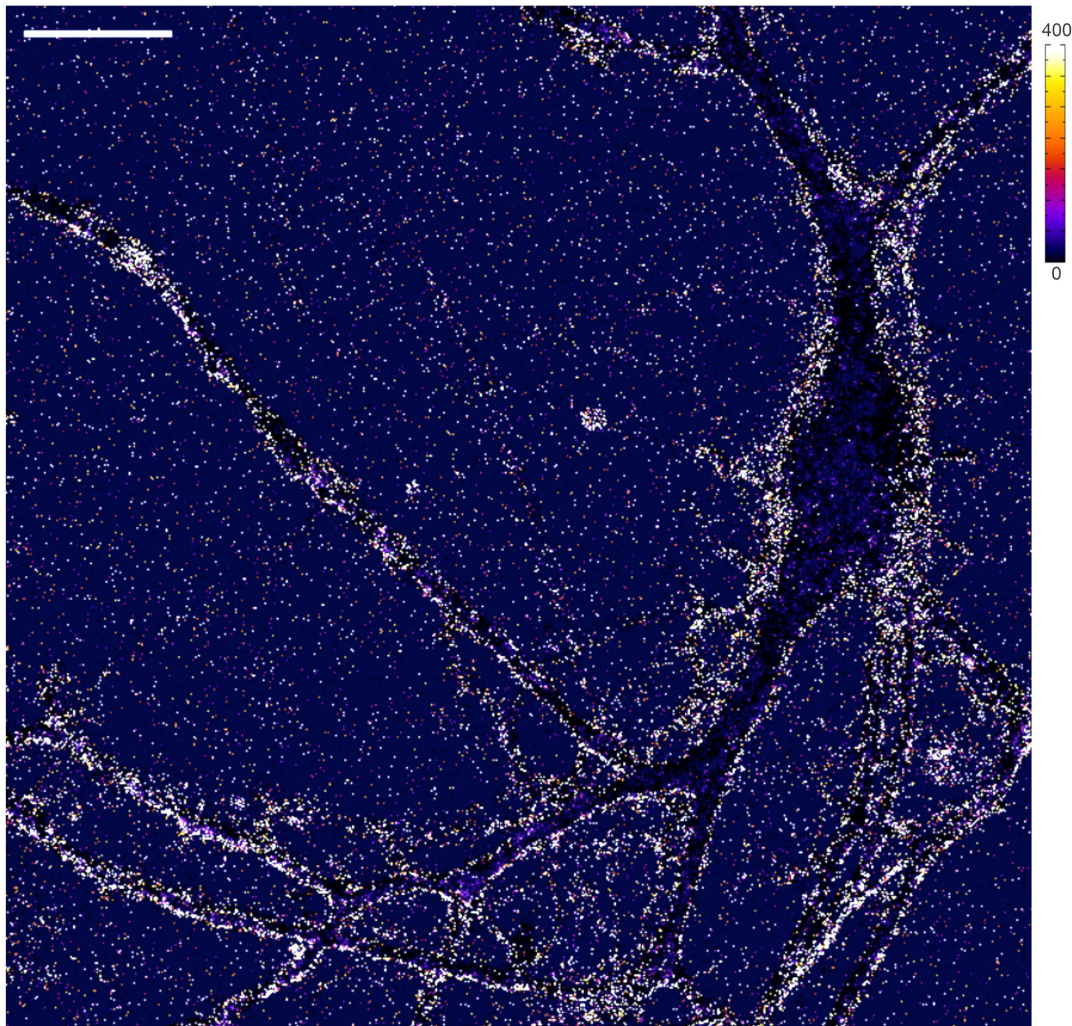

616

617 **Figure 3-figure supplement 4 Nav1.2 ICL1-36aa targets GFP to membrane.**

618 (A) Protein sequence alignment of Nav1.2 and Nav1.6 ICL1 region. Bold blue line highlights  
619 identified 36aa region. (B) A representative image of Nav1.2 ICL1-36aa GFP/mCherry ratio  
620 showed the specific distribution of Nav1.2 ICL1-36aa along the membrane. Right color bar  
621 indicates the ratio level. Scale bar, 20  $\mu$ m.

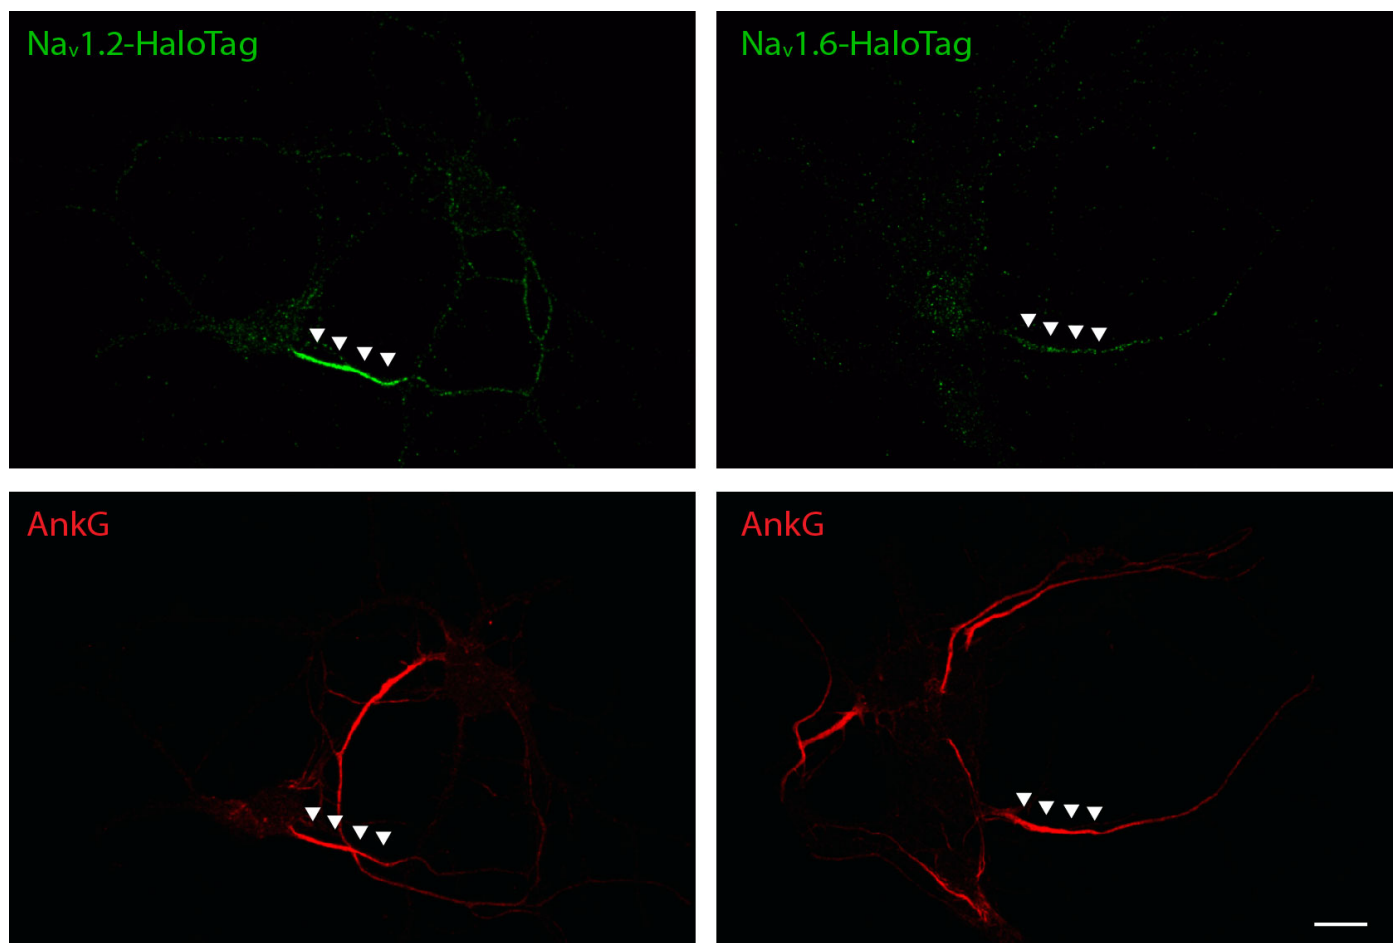

622

623 **Figure 4-figure supplement 1 HaloTag-labeled Nav1.2 and Nav1.6 were enriched in AIS.**  
624 With JF646-HTL bulk labeling, Nav1.2 (left) and Nav1.6 (right) with HaloTag knockin have higher  
625 concentrations in the AIS, similar to V5 or HA tag knockin. Scale bar, 10  $\mu$ m.

626 **VIDEOS**

627

628 **Video 1 (Related to Figure 1)**

629 A representative cultured hippocampal neuron with double labeling of Nav1.2 (V5, green) and  
630 Nav1.6 (HA, red) co-stained with Flag (blue).

631

632 **Video 2 (Related to Figure 1)**

633 Raw Airyscan image of V5-labeled Nav1.2 (green) and HA-labeled Nav1.6 (purple) vesicles in the  
634 soma region of a cultured hippocampal neuron and their distributions after segmentation. Scale  
635 bar, 5  $\mu\text{m}$ .

636

637 **Video 3 (Related to Figure 2)**

638 3D Airyscan image of Nav1.2 knockin neurons (V5, green) in mouse cortex co-stained with MBP  
639 (red) shows its continuous distribution along distal axons without myelin coverage.

640

641 **Video 4 (Related to Figure 2)**

642 3D Airyscan image of Nav1.6 knockin neurons (V5, green) in mouse cortex co-stained with MBP  
643 (red) shows its presence in myelinated neurons.

644

645 **Video 5 (Related to Figure 2)**

646 3D Airyscan image of Nav1.6 knockin neurons (V5, green) in mouse cortex co-stained with Caspr  
647 (red) shows its localization at nodes of Ranvier.

648

649 **Video 6 (Related to Figure 4)**

650 FRAP experiment of a cultured hippocampal neuron with HaloTag-labeled Nav1.2 (stained with  
651 JF549-HTL, red) shows very slow fluorescent recovery at AIS (white rectangle) after  
652 photobleaching and moderate fluorescent recovery in distal axons (green and yellow rectangles).  
653 Scale bar, 10  $\mu\text{m}$ .

654 **TABLES**

655 **Table 1**

656 Localization and tracking parameters for the MTT program

657

|                                                            |       |
|------------------------------------------------------------|-------|
| Localization Error                                         | 1E-06 |
| Deflation loops                                            | 3     |
| Blinking (frames)                                          | 1     |
| Maximum number competitors                                 | 3     |
| Maximum Diffusion Coefficient ( $\mu\text{m}^2/\text{s}$ ) | 3     |

658



659 **SOURCE DATA AND CODE FILES**

660

661 **Figure 1-source data 1 (Related to Figure 1D)**

662

663 **Figure 1-source data 2 (Related to Figure 1E)**

664

665 **Figure 1-figure supplement 4-source code 1, 2 (Related to Figure 1-figure supplement 4A)**

666

667 **Figure 1-figure supplement 5-source data 1 (Related to Figure 1-figure supplement 5)**

668

669 **Figure 2-source data 1 (Related to Figure 2F)**

670

671 **Figure 2-source data 2 (Related to Figure 2G)**

672

673 **Figure 2-figure supplement 1-source data 1, 2 (Related to Figure 2-figure supplement 1)**

674

675 **Figure 3-source data 1 (Related to Figure 3B)**

676

677 **Figure 3-source data 2 (Related to Figure 3C)**

678

679 **Figure 3-figure supplement 2-source data 1 (Related to Figure 3-figure supplement 2C)**

680

681 **Figure 4-source data 1 (Related to Figure 4C)**

682

683 **Figure 4-source data 2 (Related to Figure 4D)**

684

685 **Figure 4-source data 3 (Related to Figure 4E)**

686

687 **Figure 4-source data 4 (Related to Figure 4F)**

## 688 REFERENCES

- 689 Baker, M. (2020). When antibodies mislead: the quest for validation. *Nature*, *585*(7824), 313-314.  
690 doi: 10.1038/d41586-020-02549-1
- 691 Boiko, T., Rasband, M. N., Levinson, S. R., Caldwell, J. H., Mandel, G., Trimmer, J. S., & Matthews,  
692 G. (2001). Compact myelin dictates the differential targeting of two sodium channel  
693 isoforms in the same axon. *Neuron*, *30*(1), 91-104. doi: 10.1016/s0896-6273(01)00265-3
- 694 Caldwell, J. H., Schaller, K. L., Lasher, R. S., Peles, E., & Levinson, S. R. (2000). Sodium channel  
695 Na(v)1.6 is localized at nodes of ranvier, dendrites, and synapses. *Proc Natl Acad Sci U S*  
696 *A*, *97*(10), 5616-5620. doi: 10.1073/pnas.090034797
- 697 Catterall, W. A., Goldin, A. L., & Waxman, S. G. (2005). International Union of Pharmacology. XLVII.  
698 Nomenclature and structure-function relationships of voltage-gated sodium channels.  
699 *Pharmacol Rev*, *57*(4), 397-409. doi: 10.1124/pr.57.4.4
- 700 Cembrowski, M. S., Wang, L., Sugino, K., Shields, B. C., & Spruston, N. (2016). Hipposeq: a  
701 comprehensive RNA-seq database of gene expression in hippocampal principal neurons.  
702 *Elife*, *5*, e14997. doi: 10.7554/eLife.14997
- 703 Chen, J., Zhang, Z., Li, L., Chen, B. C., Revyakin, A., Hajj, B., . . . Liu, Z. (2014). Single-molecule  
704 dynamics of enhanceosome assembly in embryonic stem cells. *Cell*, *156*(6), 1274-1285.  
705 doi: 10.1016/j.cell.2014.01.062
- 706 Chiou, S. H., Winters, I. P., Wang, J., Naranjo, S., Dudgeon, C., Tamburini, F. B., . . . Winslow, M.  
707 M. (2015). Pancreatic cancer modeling using retrograde viral vector delivery and in vivo  
708 CRISPR/Cas9-mediated somatic genome editing. *Genes Dev*, *29*(14), 1576-1585. doi:  
709 10.1101/gad.264861.115
- 710 Chong, S., Dugast-Darzacq, C., Liu, Z., Dong, P., Dailey, G. M., Cattoglio, C., . . . Tjian, R. (2018).  
711 Imaging dynamic and selective low-complexity domain interactions that control gene  
712 transcription. *Science*, *361*(6400). doi: 10.1126/science.aar2555
- 713 Craner, M. J., Newcombe, J., Black, J. A., Hartle, C., Cuzner, M. L., & Waxman, S. G. (2004).  
714 Molecular changes in neurons in multiple sclerosis: altered axonal expression of Nav1.2  
715 and Nav1.6 sodium channels and Na<sup>+</sup>/Ca<sup>2+</sup> exchanger. *Proc Natl Acad Sci U S A*, *101*(21),  
716 8168-8173. doi: 10.1073/pnas.0402765101
- 717 Garrido, J. J., Giraud, P., Carlier, E., Fernandes, F., Moussif, A., Fache, M. P., . . . Dargent, B. (2003).  
718 A targeting motif involved in sodium channel clustering at the axonal initial segment.  
719 *Science*, *300*(5628), 2091-2094. doi: 10.1126/science.1085167
- 720 Gasser, A., Ho, T. S., Cheng, X., Chang, K. J., Waxman, S. G., Rasband, M. N., & Dib-Hajj, S. D. (2012).  
721 An ankyrinG-binding motif is necessary and sufficient for targeting Nav1.6 sodium  
722 channels to axon initial segments and nodes of Ranvier. *J Neurosci*, *32*(21), 7232-7243.  
723 doi: 10.1523/JNEUROSCI.5434-11.2012
- 724 Grimm, J. B., English, B. P., Chen, J., Slaughter, J. P., Zhang, Z., Revyakin, A., . . . Lavis, L. D. (2015).  
725 A general method to improve fluorophores for live-cell and single-molecule microscopy.  
726 *Nat Methods*, *12*(3), 244-250, 243 p following 250. doi: 10.1038/nmeth.3256
- 727 Hodgkin, A. L., & Huxley, A. F. (1952). A quantitative description of membrane current and its  
728 application to conduction and excitation in nerve. *J Physiol*, *117*(4), 500-544. doi:  
729 10.1113/jphysiol.1952.sp004764

- 730 Hu, W., Tian, C., Li, T., Yang, M., Hou, H., & Shu, Y. (2009). Distinct contributions of Na(v)1.6 and  
731 Na(v)1.2 in action potential initiation and backpropagation. *Nat Neurosci*, *12*(8), 996-1002.  
732 doi: 10.1038/nn.2359
- 733 Johnson, K. W., Herold, K. F., Milner, T. A., Hemmings, H. C., Jr., & Platholi, J. (2017). Sodium  
734 channel subtypes are differentially localized to pre- and post-synaptic sites in rat  
735 hippocampus. *J Comp Neurol*, *525*(16), 3563-3578. doi: 10.1002/cne.24291
- 736 Knight, S. C., Xie, L., Deng, W., Guglielmi, B., Witkowsky, L. B., Bosanac, L., . . . Tjian, R. (2015).  
737 Dynamics of CRISPR-Cas9 genome interrogation in living cells. *Science*, *350*(6262), 823-  
738 826. doi: 10.1126/science.aac6572
- 739 Labun, K., Montague, T. G., Krause, M., Torres Cleuren, Y. N., Tjeldnes, H., & Valen, E. (2019).  
740 CHOPCHOP v3: expanding the CRISPR web toolbox beyond genome editing. *Nucleic Acids*  
741 *Res*, *47*(W1), W171-W174. doi: 10.1093/nar/gkz365
- 742 Lai, H. C., & Jan, L. Y. (2006). The distribution and targeting of neuronal voltage-gated ion channels.  
743 *Nat Rev Neurosci*, *7*(7), 548-562. doi: 10.1038/nrn1938
- 744 Lemaillet, G., Walker, B., & Lambert, S. (2003). Identification of a conserved ankyrin-binding motif  
745 in the family of sodium channel alpha subunits. *J Biol Chem*, *278*(30), 27333-27339. doi:  
746 10.1074/jbc.M303327200
- 747 Lerner, J., Gomez-Garcia, P. A., McCarthy, R. L., Liu, Z., Lakadamyali, M., & Zaret, K. S. (2020).  
748 Two-parameter single-molecule analysis for measurement of chromatin mobility. *STAR*  
749 *Protoc*, *1*(3), 100223. doi: 10.1016/j.xpro.2020.100223
- 750 Liu, H., Dong, P., Ioannou, M. S., Li, L., Shea, J., Pasolli, H. A., . . . Liu, Z. (2018). Visualizing long-  
751 term single-molecule dynamics in vivo by stochastic protein labeling. *Proc Natl Acad Sci U*  
752 *SA*, *115*(2), 343-348. doi: 10.1073/pnas.1713895115
- 753 Lorincz, A., & Nusser, Z. (2010). Molecular identity of dendritic voltage-gated sodium channels.  
754 *Science*, *328*(5980), 906-909. doi: 10.1126/science.1187958
- 755 Meisler, M. H., Hill, S. F., & Yu, W. (2021). Sodium channelopathies in neurodevelopmental  
756 disorders. *Nat Rev Neurosci*, *22*(3), 152-166. doi: 10.1038/s41583-020-00418-4
- 757 Mikuni, T., Nishiyama, J., Sun, Y., Kamasawa, N., & Yasuda, R. (2016). High-Throughput, High-  
758 Resolution Mapping of Protein Localization in Mammalian Brain by In Vivo Genome  
759 Editing. *Cell*, *165*(7), 1803-1817. doi: 10.1016/j.cell.2016.04.044
- 760 Niswender, C. M., & Conn, P. J. (2010). Metabotropic glutamate receptors: physiology,  
761 pharmacology, and disease. *Annu Rev Pharmacol Toxicol*, *50*, 295-322. doi:  
762 10.1146/annurev.pharmtox.011008.145533
- 763 Onwuli, D. O., Yanez-Bisbe, L., Pinsach-Abuin, M. L., Tarradas, A., Brugada, R., Greenman, J., . . .  
764 Beltran-Alvarez, P. (2017). Do sodium channel proteolytic fragments regulate sodium  
765 channel expression? *Channels (Austin)*, *11*(5), 476-481. doi:  
766 10.1080/19336950.2017.1355663
- 767 Petreanu, L., Mao, T., Sternson, S. M., & Svoboda, K. (2009). The subcellular organization of  
768 neocortical excitatory connections. *Nature*, *457*(7233), 1142-1145. doi:  
769 10.1038/nature07709
- 770 Rush, A. M., Dib-Hajj, S. D., & Waxman, S. G. (2005). Electrophysiological properties of two axonal  
771 sodium channels, Nav1.2 and Nav1.6, expressed in mouse spinal sensory neurones. *J*  
772 *Physiol*, *564*(Pt 3), 803-815. doi: 10.1113/jphysiol.2005.083089

- 773 Sanders, S. J., Campbell, A. J., Cottrell, J. R., Moller, R. S., Wagner, F. F., Auldridge, A. L., . . . Bender,  
774 K. J. (2018). Progress in Understanding and Treating SCN2A-Mediated Disorders. *Trends*  
775 *Neurosci*, *41*(7), 442-456. doi: 10.1016/j.tins.2018.03.011
- 776 Serge, A., Bertaux, N., Rigneault, H., & Marguet, D. (2008). Dynamic multiple-target tracing to  
777 probe spatiotemporal cartography of cell membranes. *Nat Methods*, *5*(8), 687-694. doi:  
778 10.1038/nmeth.1233
- 779 Spratt, P. W. E., Ben-Shalom, R., Keeshen, C. M., Burke, K. J., Jr., Clarkson, R. L., Sanders, S. J., &  
780 Bender, K. J. (2019). The Autism-Associated Gene Scn2a Contributes to Dendritic  
781 Excitability and Synaptic Function in the Prefrontal Cortex. *Neuron*, *103*(4), 673-685 e675.  
782 doi: 10.1016/j.neuron.2019.05.037
- 783 Stevens, R. C., Cherezov, V., Katritch, V., Abagyan, R., Kuhn, P., Rosen, H., & Wuthrich, K. (2013).  
784 The GPCR Network: a large-scale collaboration to determine human GPCR structure and  
785 function. *Nat Rev Drug Discov*, *12*(1), 25-34. doi: 10.1038/nrd3859
- 786 Suzuki, K., Tsunekawa, Y., Hernandez-Benitez, R., Wu, J., Zhu, J., Kim, E. J., . . . Belmonte, J. C.  
787 (2016). In vivo genome editing via CRISPR/Cas9 mediated homology-independent  
788 targeted integration. *Nature*, *540*(7631), 144-149. doi: 10.1038/nature20565
- 789 Tian, C., Wang, K., Ke, W., Guo, H., & Shu, Y. (2014). Molecular identity of axonal sodium channels  
790 in human cortical pyramidal cells. *Front Cell Neurosci*, *8*, 297. doi:  
791 10.3389/fncel.2014.00297
- 792 Vacher, H., Mohapatra, D. P., & Trimmer, J. S. (2008). Localization and targeting of voltage-  
793 dependent ion channels in mammalian central neurons. *Physiol Rev*, *88*(4), 1407-1447.  
794 doi: 10.1152/physrev.00002.2008
- 795 Viswanathan, S., Williams, M. E., Bloss, E. B., Stasevich, T. J., Speer, C. M., Nern, A., . . . Looger, L.  
796 L. (2015). High-performance probes for light and electron microscopy. *Nat Methods*, *12*(6),  
797 568-576. doi: 10.1038/nmeth.3365
- 798 Wang, H. G., Bavley, C. C., Li, A., Jones, R. M., Hackett, J. E., Bayley, Y., . . . Pitt, G. S. (2021).  
799 Scn2a severe hypomorphic mutation decreases excitatory synaptic input and causes  
800 autism-associated behaviors. *JCI Insight*. doi: 10.1172/jci.insight.150698
- 801 Xu, K., Zhong, G., & Zhuang, X. (2013). Actin, spectrin, and associated proteins form a periodic  
802 cytoskeletal structure in axons. *Science*, *339*(6118), 452-456. doi:  
803 10.1126/science.1232251
- 804 Yamagata, T., Ogiwara, I., Mazaki, E., Yanagawa, Y., & Yamakawa, K. (2017). Nav1.2 is expressed  
805 in caudal ganglionic eminence-derived disinhibitory interneurons: Mutually exclusive  
806 distributions of Nav1.1 and Nav1.2. *Biochem Biophys Res Commun*, *491*(4), 1070-1076.  
807 doi: 10.1016/j.bbrc.2017.08.013
- 808 Yu, F. H., Yarov-Yarovoy, V., Gutman, G. A., & Catterall, W. A. (2005). Overview of molecular  
809 relationships in the voltage-gated ion channel superfamily. *Pharmacol Rev*, *57*(4), 387-  
810 395. doi: 10.1124/pr.57.4.13
- 811 Zeisel, A., Munoz-Manchado, A. B., Codeluppi, S., Lonnerberg, P., La Manno, G., Jureus, A., . . .  
812 Linnarsson, S. (2015). Brain structure. Cell types in the mouse cortex and hippocampus  
813 revealed by single-cell RNA-seq. *Science*, *347*(6226), 1138-1142. doi:  
814 10.1126/science.aaa1934
- 815
